# Supplementary material for: Genetic predisposition to altered blood cell homeostasis is associated with glioma risk and survival
Source: PubMed Central journal article supplement — medRxiv. 2023 Oct 16:2023.10.15.23296448. Preprint. [Version 1] doi: 10.1101/2023.10.15.23296448 (PMC10614986; doi:10.1101/2023.10.15.23296448), 2023-10-16

**Supplementary Table S1: Mendelian randomization results for glioma overall.** Odds ratios (OR) and 95% confidence intervals (CI) for the effect of increasing blood cell counts or cell type ratios on the risk of glioma. MR Egger results are only presented for blood cell traits with statistically significant evidence of directional pleiotropy (MR Egger intercept  $\beta_0 \neq 0$ ,  $p < 0.05$ ).

| Blood Cell Trait | MR Estimator       | N <sub>SNP</sub> | Explained Variance | Glioma Overall |               |       |
|------------------|--------------------|------------------|--------------------|----------------|---------------|-------|
|                  |                    |                  |                    | OR             | (95% CI)      | P     |
| Basophils        | IVW-MRE            | 146              | 0.045              | 0.82           | (0.57 – 1.18) | 0.29  |
|                  | Maximum likelihood |                  |                    | 0.82           | (0.58 – 1.16) | 0.26  |
|                  | Weighted median    |                  |                    | 0.81           | (0.46 – 1.43) | 0.47  |
|                  | RAPS               |                  |                    | 0.81           | (0.56 – 1.19) | 0.29  |
|                  | PRESSO             |                  |                    | 0.82           | (0.57 – 1.18) | 0.29  |
| Eosinophils      | IVW-MRE            | 370              | 0.105              | 0.96           | (0.82 – 1.12) | 0.60  |
|                  | Maximum likelihood |                  |                    | 0.96           | (0.82 – 1.12) | 0.59  |
|                  | Weighted median    |                  |                    | 0.93           | (0.71 – 1.20) | 0.56  |
|                  | RAPS               |                  |                    | 0.98           | (0.83 – 1.15) | 0.82  |
|                  | MR Egger           |                  |                    | 0.67           | (0.46 – 0.99) | 0.044 |
| Lymphocytes      | IVW-MRE            | 414              | 0.114              | 0.98           | (0.86 – 1.11) | 0.72  |
|                  | Maximum likelihood |                  |                    | 0.98           | (0.86 – 1.11) | 0.71  |
|                  | Weighted median    |                  |                    | 1.29           | (1.01 – 1.65) | 0.041 |
|                  | RAPS               |                  |                    | 0.94           | (0.81 – 1.08) | 0.36  |
|                  | MR Egger           |                  |                    | 1.23           | (0.98 – 1.54) | 0.075 |
| Monocytes        | IVW-MRE            | 479              | 0.159              | 0.98           | (0.89 – 1.11) | 0.72  |
|                  | Maximum likelihood |                  |                    | 1.01           | (0.98 – 1.05) | 0.40  |
|                  | Weighted median    |                  |                    | 1.01           | (0.99 – 1.04) | 0.33  |
|                  | RAPS               |                  |                    | 1.02           | (0.99 – 1.05) | 0.20  |
|                  | MR Egger           |                  |                    | 1.02           | (0.99 – 1.06) | 0.31  |
| Neutrophils      | IVW-MRE            | 296              | 0.082              | 1.02           | (0.99 – 1.06) | 0.19  |
|                  | Maximum likelihood |                  |                    | 0.99           | (0.88 – 1.10) | 0.82  |
|                  | Weighted median    |                  |                    | 0.87           | (0.70 – 1.10) | 0.24  |
|                  | RAPS               |                  |                    | 0.87           | (0.73 – 1.05) | 0.14  |
|                  | PRESSO             |                  |                    | 0.77           | (0.58 – 1.04) | 0.090 |
| Platelets        | IVW-MRE            | 668              | 0.235              | 0.90           | (0.73 – 1.11) | 0.33  |
|                  | Maximum likelihood |                  |                    | 0.83           | (0.68 – 1.02) | 0.079 |
|                  | Weighted median    |                  |                    | 1.02           | (0.97 – 1.07) | 0.51  |
|                  | RAPS               |                  |                    | 1.02           | (0.97 – 1.06) | 0.46  |
|                  | MR Egger           |                  |                    | 0.99           | (0.94 – 1.04) | 0.63  |
|                  |                    |                  |                    | 1.01           | (0.96 – 1.06) | 0.73  |
|                  |                    |                  |                    | 0.99           | (0.94 – 1.05) | 0.76  |

|     |                    |     |       |      |               |                      |
|-----|--------------------|-----|-------|------|---------------|----------------------|
|     | PRESSO             |     |       | 1.10 | (0.99 – 1.21) | 0.074                |
| LMR | IVW-MRE            |     |       | 1.12 | (0.95 – 1.31) | 0.18                 |
|     | Maximum likelihood |     |       | 1.12 | (0.98 – 1.28) | 0.11                 |
|     | Weighted median    | 450 | 0.147 | 1.10 | (0.86 – 1.40) | 0.44                 |
|     | RAPS               |     |       | 1.05 | (0.90 – 1.22) | 0.51                 |
|     | PRESSO             |     |       | 1.07 | (0.93 – 1.23) | 0.38                 |
| NLR | IVW-MRE            |     |       | 0.97 | (0.76 – 1.24) | 0.82                 |
|     | Maximum likelihood |     |       | 0.97 | (0.79 – 1.19) | 0.78                 |
|     | Weighted median    | 249 | 0.063 | 1.00 | (0.72 – 1.37) | 0.98                 |
|     | RAPS               |     |       | 0.97 | (0.76 – 1.25) | 0.83                 |
|     | PRESSO             |     |       | 0.92 | (0.73 – 1.15) | 0.45                 |
| PLR | IVW-MRE            |     |       | 1.25 | (1.07 – 1.47) | 4.9×10 <sup>-3</sup> |
|     | Maximum likelihood |     |       | 1.25 | (1.10 – 1.43) | 9.1×10 <sup>-4</sup> |
|     | Weighted median    | 470 | 0.145 | 1.18 | (0.93 – 1.50) | 0.16                 |
|     | RAPS               |     |       | 1.22 | (1.05 – 1.43) | 0.011                |
|     | PRESSO             |     |       | 1.21 | (1.05 – 1.40) | 8.8×10 <sup>-3</sup> |

<sup>1</sup> Out-of-sample trait variance explained by the genetic instruments was previously reported in Kachuri et al. (2021)<sup>22</sup> and estimated for the subset of genetic instruments that were available for this analysis

Abbreviations:

|         |                                                        |
|---------|--------------------------------------------------------|
| IVW-MRE | Inverse variance weighted multiplicative random effect |
| RAPS    | Robust adjusted profile score                          |
| PRESSO  | Pleiotropy Residual Sum and Outlier                    |
| LMR     | Lymphocyte to monocyte ratio                           |
| NLR     | Neutrophil to lymphocyte ratio                         |
| PLR     | Platelet to lymphocyte ratio                           |

**Supplementary Table S2: Results of Mendelian Randomization diagnostic tests.** Assessment of the robustness of underlying Mendelian randomization assumptions for each set of analyses of glioma susceptibility, overall and stratified by major molecular subtypes.

| Blood Cell Trait | $I^2_{GX}$ | Glioma                                                    |     |                       |                       |             |                       | IDH-mutated (IDH <sub>mut</sub> )                               |     |                       |                       |             |                       |
|------------------|------------|-----------------------------------------------------------|-----|-----------------------|-----------------------|-------------|-----------------------|-----------------------------------------------------------------|-----|-----------------------|-----------------------|-------------|-----------------------|
|                  |            | Heterogeneity <sup>1</sup>                                |     |                       | MR Egger <sup>2</sup> |             | MR PRESSO             | Heterogeneity <sup>1</sup>                                      |     |                       | MR Egger <sup>2</sup> |             | MR PRESSO             |
|                  |            | Q                                                         | DF  | $P_{Q-value}$         | $\beta_0$             | $P_{Egger}$ | $P_{Global}^3$        | Q                                                               | DF  | $P_{Q-value}$         | $\beta_0$             | $P_{Egger}$ | $P_{Global}^3$        |
| Basophils        | 0.985      | 162.1                                                     | 145 | 0.16                  | -0.011                | 0.24        | 0.15                  | 171.3                                                           | 145 | 0.067                 | -0.008                | 0.58        | 0.073                 |
| Eosinophils      | 0.986      | 406.2                                                     | 369 | 0.089                 | 0.012                 | 0.048       | 0.091                 | 432.7                                                           | 369 | 0.012                 | 0.006                 | 0.51        | 0.011                 |
| Lymphocytes      | 0.986      | 464.3                                                     | 413 | 0.041                 | -0.010                | 0.015       | 0.031                 | 484.7                                                           | 413 | $8.5 \times 10^{-3}$  | -0.009                | 0.14        | $8.0 \times 10^{-3}$  |
| Monocytes        | 0.988      | 639.9                                                     | 478 | $9.6 \times 10^{-7}$  | -0.005                | 0.048       | 0.013                 | 765.8                                                           | 478 | $1.1 \times 10^{-15}$ | -0.006                | 0.19        | $2.5 \times 10^{-4}$  |
| Neutrophils      | 0.985      | 476.1                                                     | 295 | $1.1 \times 10^{-10}$ | 0.007                 | 0.37        | $<1.0 \times 10^{-4}$ | 385.2                                                           | 295 | $3.2 \times 10^{-4}$  | 0.013                 | 0.23        | $3.0 \times 10^{-4}$  |
| Platelets        | 0.988      | 906.6                                                     | 667 | $1.6 \times 10^{-9}$  | 0.005                 | 0.031       | $6.7 \times 10^{-5}$  | 858.6                                                           | 667 | $6.8 \times 10^{-7}$  | 0.004                 | 0.24        | $6.7 \times 10^{-5}$  |
| LMR              | 0.988      | 631.9                                                     | 449 | $2.5 \times 10^{-8}$  | -0.005                | 0.33        | $<6.7 \times 10^{-5}$ | 753.2                                                           | 449 | $9.3 \times 10^{-18}$ | -0.007                | 0.42        | $<6.7 \times 10^{-5}$ |
| NLR              | 0.985      | 355.0                                                     | 248 | $9.5 \times 10^{-6}$  | 0.013                 | 0.16        | $<1e \times 10^{-4}$  | 306.7                                                           | 248 | $6.5 \times 10^{-3}$  | -0.008                | 0.54        | $6.2 \times 10^{-3}$  |
| PLR              | 0.987      | 658.8                                                     | 469 | $1.5 \times 10^{-8}$  | 0.009                 | 0.11        | $<6.7 \times 10^{-5}$ | 635.5                                                           | 469 | $4.3 \times 10^{-7}$  | 0.009                 | 0.30        | $<6.7 \times 10^{-5}$ |
|                  | $I^2_{GX}$ | IDH-mutated 1p/19q co-deleted (IDH <sub>mut-code1</sub> ) |     |                       |                       |             |                       | IDH-mutated 1p/19q non-codeleted (IDH <sub>mut-noncode1</sub> ) |     |                       |                       |             |                       |
|                  |            | Heterogeneity <sup>1</sup>                                |     |                       | MR Egger <sup>2</sup> |             | MR PRESSO             | Heterogeneity <sup>1</sup>                                      |     |                       | MR Egger <sup>2</sup> |             | MR PRESSO             |
|                  |            | Q                                                         | DF  | $P_{Q-value}$         | $\beta_0$             | $P_{Egger}$ | $P_{Global}^3$        | Q                                                               | DF  | $P_{Q-value}$         | $\beta_0$             | $P_{Egger}$ | $P_{Global}^3$        |
| Basophils        | 0.985      | 162.8                                                     | 145 | 0.15                  | -0.018                | 0.38        | 0.14                  | 194.0                                                           | 145 | $4.1 \times 10^{-3}$  | -0.010                | 0.58        | $4.3 \times 10^{-3}$  |
| Eosinophils      | 0.986      | 436.8                                                     | 369 | $8.6 \times 10^{-3}$  | -0.008                | 0.59        | $8.1 \times 10^{-3}$  | 468.8                                                           | 369 | $3.2 \times 10^{-4}$  | 0.017                 | 0.17        | $3.6 \times 10^{-4}$  |
| Lymphocytes      | 0.986      | 502.4                                                     | 413 | $1.7 \times 10^{-3}$  | -0.016                | 0.086       | $1.8 \times 10^{-3}$  | 430.1                                                           | 413 | 0.27                  | -0.007                | 0.34        | 0.26                  |
| Monocytes        | 0.988      | 665.9                                                     | 478 | $2.6 \times 10^{-8}$  | -0.005                | 0.38        | $1.3 \times 10^{-3}$  | 716.8                                                           | 478 | $8.0 \times 10^{-12}$ | -0.005                | 0.32        | $2.8 \times 10^{-3}$  |
| Neutrophils      | 0.985      | 356.9                                                     | 295 | $7.9 \times 10^{-3}$  | -0.006                | 0.71        | $7.7 \times 10^{-3}$  | 367.7                                                           | 295 | $2.5 \times 10^{-3}$  | 0.018                 | 0.19        | $2.4 \times 10^{-3}$  |
| Platelets        | 0.988      | 931.4                                                     | 667 | $4.7 \times 10^{-11}$ | 0.007                 | 0.21        | $6.7 \times 10^{-5}$  | 752.9                                                           | 667 | 0.011                 | 0.004                 | 0.28        | 0.019                 |
| LMR              | 0.988      | 645.2                                                     | 449 | $3.3 \times 10^{-9}$  | 0.001                 | 0.92        | $<6.7 \times 10^{-5}$ | 681.6                                                           | 449 | $7.8 \times 10^{-12}$ | -0.014                | 0.19        | $<6.7 \times 10^{-5}$ |
| NLR              | 0.985      | 300.1                                                     | 248 | 0.013                 | 0.008                 | 0.66        | 0.012                 | 283.4                                                           | 248 | 0.061                 | -0.020                | 0.19        | 0.055                 |
| PLR              | 0.987      | 596.8                                                     | 469 | $5.5 \times 10^{-5}$  | 0.012                 | 0.35        | $6.7 \times 10^{-5}$  | 600.0                                                           | 469 | $3.8 \times 10^{-12}$ | 0.015                 | 0.15        | $<6.7 \times 10^{-5}$ |

|             | IDH wildtype (IDH <sub>wt</sub> ) |                            |     |                      |                       |                    |                                  |
|-------------|-----------------------------------|----------------------------|-----|----------------------|-----------------------|--------------------|----------------------------------|
|             | I <sup>2</sup> <sub>Gx</sub>      | Heterogeneity <sup>1</sup> |     |                      | MR Egger <sup>2</sup> |                    | MR PRESSO                        |
|             |                                   | Q                          | DF  | P <sub>Q-value</sub> | β <sub>0</sub>        | P <sub>Egger</sub> | P <sub>Global</sub> <sup>3</sup> |
| Basophils   | 0.985                             | 143.6                      | 145 | 0.52                 | -0.014                | 0.22               | 0.53                             |
| Eosinophils | 0.986                             | 387.6                      | 369 | 0.24                 | 0.006                 | 0.45               | 0.24                             |
| Lymphocytes | 0.986                             | 431.3                      | 413 | 0.26                 | -0.006                | 0.36               | 0.26                             |
| Monocytes   | 0.988                             | 506.5                      | 478 | 0.18                 | -0.009                | 0.082              | 0.32                             |
| Neutrophils | 0.985                             | 456.6                      | 295 | 4.5×10 <sup>-9</sup> | -0.005                | 0.084              | <1.0×10 <sup>-4</sup>            |
| Platelets   | 0.988                             | 857.7                      | 667 | 7.5×10 <sup>-7</sup> | 0.000                 | 0.98               | 1.3×10 <sup>-4</sup>             |
| LMR         | 0.988                             | 510.4                      | 449 | 0.024                | 0.024                 | 0.029              | 0.025                            |
| NLR         | 0.985                             | 319.4                      | 248 | 1.5×10 <sup>-3</sup> | 0.003                 | 0.26               | 1.9×10 <sup>-3</sup>             |
| PLR         | 0.987                             | 601.0                      | 469 | 3.4×10 <sup>-5</sup> | 0.014                 | 0.059              | <6.7×10 <sup>-5</sup>            |

- <sup>1</sup> Modified Cochran's Q test for heterogeneity in causal effect estimates (indicative of horizontal pleiotropy), p-values<0.05 are considered statistically significant
- <sup>2</sup> Tests for directional horizontal pleiotropy indicated by non-zero in MR Egger intercept (β<sub>0</sub>) values, p-values<0.05 are considered statistically significant
- <sup>3</sup> Tests for horizontal pleiotropy, empirical p-values were estimated based on 12000-15000 replicates, p-values<0.05 are considered statistically significant
- <sup>4</sup> Values of I<sup>2</sup><sub>Gx</sub><0.90 indicate potential for regression dilution bias and violation of the NOME (no measurement error assumption)

Abbreviations:

PRESSO Pleiotropy Residual Sum and Outlier

LMR Lymphocyte to monocyte ratio

NLR Neutrophil to lymphocyte ratio

PLR Platelet to lymphocyte ratio

**Supplementary Table S3: Mendelian randomization results for IDH mutant (IDH<sub>mut</sub>) glioma.** Odds ratios (OR) and 95% confidence intervals (CI) estimate the effect of increasing blood cell counts or cell type ratios on disease risk. MR Egger results are only presented for traits with statistically significant evidence of directional pleiotropy (MR Egger intercept  $\beta_0 \neq 0$ ,  $p < 0.05$ ).

| Blood Cell Trait | MR Estimator       | N <sub>SNP</sub> | IDH <sub>mut</sub> |               |                      | IDH <sub>mut</sub> 1p/19q co-deleted |               |      | IDH <sub>mut</sub> 1p/19q non-codeleted |               |                      |
|------------------|--------------------|------------------|--------------------|---------------|----------------------|--------------------------------------|---------------|------|-----------------------------------------|---------------|----------------------|
|                  |                    |                  | OR                 | (95% CI)      | P                    | OR                                   | (95% CI)      | P    | OR                                      | (95% CI)      | P                    |
| Basophils        | IVW-MRE            | 146              | 0.67               | (0.38 – 1.20) | 0.18                 | 0.79                                 | (0.34 – 1.18) | 0.57 | 0.73                                    | (0.34 – 1.57) | 0.42                 |
|                  | Maximum likelihood |                  | 0.67               | (0.39 – 1.15) | 0.15                 | 0.79                                 | (0.36 – 1.73) | 0.55 | 0.73                                    | (0.38 – 1.43) | 0.36                 |
|                  | Weighted median    |                  | 0.50               | (0.21 – 1.22) | 0.13                 | 0.54                                 | (0.14 – 2.02) | 0.36 | 0.29                                    | (0.10 – 0.85) | 0.023                |
|                  | RAPS               |                  | 0.57               | (0.31 – 1.03) | 0.064                | 0.65                                 | (0.28 – 1.53) | 0.33 | 0.65                                    | (0.30 – 1.42) | 0.28                 |
|                  | PRESSO             |                  | 0.67               | (0.38 – 1.20) | 0.18                 | 0.79                                 | (0.34 – 1.18) | 0.57 | 0.73                                    | (0.34 – 1.57) | 0.42                 |
| Eosinophils      | IVW-MRE            | 370              | 0.94               | (0.73 – 1.20) | 0.60                 | 1.13                                 | (0.78 – 1.64) | 0.51 | 0.83                                    | (0.60 – 1.15) | 0.26                 |
|                  | Maximum likelihood |                  | 0.93               | (0.74 – 1.18) | 0.57                 | 1.13                                 | (0.80 – 1.60) | 0.48 | 0.83                                    | (0.62 – 1.11) | 0.21                 |
|                  | Weighted median    |                  | 0.85               | (0.57 – 1.25) | 0.40                 | 1.12                                 | (0.61 – 2.03) | 0.72 | 0.92                                    | (0.58 – 1.48) | 0.74                 |
|                  | RAPS               |                  | 0.95               | (0.73 – 1.22) | 0.66                 | 1.16                                 | (0.79 – 1.71) | 0.44 | 0.87                                    | (0.63 – 1.21) | 0.40                 |
|                  | PRESSO             |                  | 0.99               | (0.78 – 1.25) | 0.91                 | 1.13                                 | (0.78 – 1.64) | 0.51 | 0.87                                    | (0.64 – 1.18) | 0.38                 |
| Lymphocytes      | IVW-MRE            | 414              | 0.83               | (0.68 – 1.02) | 0.079                | 1.07                                 | (0.79 – 1.45) | 0.67 | 0.70                                    | (0.55 – 0.89) | 3.8×10 <sup>-3</sup> |
|                  | Maximum likelihood |                  | 0.84               | (0.69 – 1.02) | 0.081                | 1.07                                 | (0.81 – 1.42) | 0.64 | 0.71                                    | (0.55 – 0.91) | 6.5×10 <sup>-3</sup> |
|                  | Weighted median    |                  | 1.25               | (0.85 – 1.84) | 0.25                 | 1.48                                 | (0.83 – 2.65) | 0.19 | 1.00                                    | (0.62 – 1.62) | 0.98                 |
|                  | RAPS               |                  | 0.75               | (0.60 – 0.93) | 8.9×10 <sup>-3</sup> | 1.05                                 | (0.76 – 1.46) | 0.76 | 0.67                                    | (0.53 – 0.86) | 1.9×10 <sup>-3</sup> |
|                  | PRESSO             |                  | 0.83               | (0.68 – 1.02) | 0.080                | 1.07                                 | (0.79 – 1.45) | 0.67 | 0.70                                    | (0.55 – 0.89) | 3.9×10 <sup>-3</sup> |
| Monocytes        | IVW-MRE            | 479              | 0.99               | (0.94 – 1.05) | 0.85                 | 1.00                                 | (0.93 – 1.07) | 0.95 | 0.98                                    | (0.92 – 1.05) | 0.62                 |
|                  | Maximum likelihood |                  | 0.99               | (0.95 – 1.04) | 0.81                 | 1.00                                 | (0.94 – 1.06) | 0.95 | 0.98                                    | (0.93 – 1.04) | 0.54                 |
|                  | Weighted median    |                  | 1.00               | (0.96 – 1.04) | 0.98                 | 1.00                                 | (0.93 – 1.06) | 0.91 | 0.99                                    | (0.94 – 1.05) | 0.82                 |
|                  | RAPS               |                  | 1.00               | (0.96 – 1.05) | 0.98                 | 1.01                                 | (0.94 – 1.07) | 0.85 | 0.99                                    | (0.94 – 1.04) | 0.66                 |
|                  | PRESSO             |                  | 1.00               | (0.95 – 1.05) | 0.96                 | 1.00                                 | (0.94 – 1.07) | 0.94 | 0.91                                    | (0.73 – 1.15) | 0.44                 |
| Neutrophils      | IVW-MRE            | 296              | 0.69               | (0.50 – 0.94) | 0.019                | 0.80                                 | (0.51 – 1.24) | 0.31 | 0.60                                    | (0.41 – 0.88) | 9.1×10 <sup>-3</sup> |
|                  | Maximum likelihood |                  | 0.69               | (0.52 – 0.90) | 7.5×10 <sup>-3</sup> | 0.79                                 | (0.53 – 1.19) | 0.26 | 0.60                                    | (0.43 – 0.85) | 3.9×10 <sup>-3</sup> |
|                  | Weighted median    |                  | 0.54               | (0.34 – 0.85) | 7.3×10 <sup>-3</sup> | 0.70                                 | (0.36 – 1.37) | 0.30 | 0.48                                    | (0.26 – 0.87) | 0.016                |
|                  | RAPS               |                  | 0.68               | (0.49 – 0.95) | 0.024                | 0.87                                 | (0.55 – 1.38) | 0.57 | 0.61                                    | (0.41 – 0.92) | 0.017                |

|           |                    |     |      |               |                      |      |               |       |      |               |                      |
|-----------|--------------------|-----|------|---------------|----------------------|------|---------------|-------|------|---------------|----------------------|
|           | PRESSO             |     | 0.67 | (0.49 – 0.91) | 0.011                | 0.80 | (0.51 – 1.24) | 0.31  | 0.60 | (0.41 – 0.88) | $9.6 \times 10^{-3}$ |
|           | IVW-MRE            |     | 0.98 | (0.91 – 1.05) | 0.53                 | 0.90 | (0.80 – 1.01) | 0.071 | 1.03 | (0.94 – 1.12) | 0.54                 |
|           | Maximum likelihood |     | 0.98 | (0.91 – 1.04) | 0.48                 | 0.90 | (0.81 – 0.99) | 0.038 | 1.03 | (0.95 – 1.12) | 0.52                 |
| Platelets | Weighted median    | 668 | 0.96 | (0.89 – 1.04) | 0.34                 | 0.89 | (0.78 – 1.00) | 0.058 | 1.02 | (0.92 – 1.12) | 0.74                 |
|           | RAPS               |     | 0.97 | (0.90 – 1.06) | 0.53                 | 0.90 | (0.79 – 1.02) | 0.097 | 1.02 | (0.93 – 1.12) | 0.66                 |
|           | PRESSO             |     | 0.97 | (0.91 – 1.04) | 0.45                 | 0.90 | (0.80 – 1.00) | 0.049 | 1.02 | (0.94 – 1.12) | 0.58                 |
|           | IVW-MRE            |     | 1.05 | (0.80 – 1.37) | 0.73                 | 1.11 | (0.77 – 1.60) | 0.58  | 1.02 | (0.74 – 1.39) | 0.91                 |
|           | Maximum likelihood |     | 1.05 | (0.85 – 1.29) | 0.66                 | 1.11 | (0.82 – 1.51) | 0.51  | 1.02 | (0.79 – 1.32) | 0.89                 |
| LMR       | Weighted median    | 450 | 0.98 | (0.68 – 1.40) | 0.90                 | 0.91 | (0.53 – 1.56) | 0.74  | 1.20 | (0.75 – 1.94) | 0.45                 |
|           | RAPS               |     | 0.94 | (0.75 – 1.19) | 0.61                 | 0.87 | (0.63 – 1.21) | 0.41  | 1.01 | (0.75 – 1.36) | 0.96                 |
|           | PRESSO             |     | 0.93 | (0.75 – 1.15) | 0.49                 | 0.95 | (0.69 – 1.29) | 0.73  | 0.92 | (0.69 – 1.21) | 0.54                 |
|           | IVW-MRE            |     | 1.17 | (0.83 – 1.66) | 0.37                 | 1.06 | (0.64 – 1.76) | 0.82  | 1.29 | (0.85 – 1.95) | 0.24                 |
|           | Maximum likelihood |     | 1.18 | (0.86 – 1.61) | 0.32                 | 1.06 | (0.66 – 1.69) | 0.81  | 1.29 | (0.87 – 1.92) | 0.20                 |
| NLR       | Weighted median    | 249 | 1.21 | (0.72 – 2.02) | 0.47                 | 0.98 | (0.46 – 2.07) | 0.96  | 1.62 | (0.85 – 3.12) | 0.14                 |
|           | RAPS               |     | 1.17 | (0.81 – 1.70) | 0.39                 | 1.11 | (0.64 – 1.90) | 0.72  | 1.26 | (0.80 – 1.96) | 0.32                 |
|           | PRESSO             |     | 1.17 | (0.83 – 1.66) | 0.37                 | 1.06 | (0.64 – 1.77) | 0.82  | 1.29 | (0.85 – 1.95) | 0.24                 |
|           | IVW-MRE            |     | 1.38 | (1.09 – 1.75) | $7.2 \times 10^{-3}$ | 1.15 | (0.82 – 1.61) | 0.43  | 1.53 | (1.15 – 2.03) | $3.7 \times 10^{-3}$ |
|           | Maximum likelihood |     | 1.39 | (1.13 – 1.71) | $1.7 \times 10^{-3}$ | 1.15 | (0.85 – 1.55) | 0.37  | 1.54 | (1.19 – 1.98) | $9.4 \times 10^{-4}$ |
| PLR       | Weighted median    | 470 | 1.25 | (0.88 – 1.78) | 0.21                 | 1.17 | (0.71 – 1.94) | 0.53  | 1.47 | (0.97 – 2.24) | 0.072                |
|           | RAPS               |     | 1.38 | (1.08 – 1.76) | 0.011                | 1.19 | (0.84 – 1.70) | 0.33  | 1.48 | (1.10 – 2.00) | $9.6 \times 10^{-3}$ |
|           | PRESSO             |     | 1.40 | (1.11 – 1.77) | $4.9 \times 10^{-3}$ | 1.14 | (0.82 – 1.61) | 0.43  | 1.55 | (1.17 – 2.06) | $2.4 \times 10^{-3}$ |

Abbreviations:

|         |                                                        |
|---------|--------------------------------------------------------|
| IVW-MRE | Inverse variance weighted multiplicative random effect |
| RAPS    | Robust adjusted profile score                          |
| PRESSO  | Pleiotropy Residual Sum and Outlier                    |
| LMR     | Lymphocyte to monocyte ratio                           |
| NLR     | Neutrophil to lymphocyte ratio                         |
| PLR     | Platelet to lymphocyte ratio                           |

**Supplementary Table S4: Mendelian randomization results for IDH wildtype (IDH<sub>wt</sub>) glioma.** Odds ratios (OR) and 95% confidence intervals (CI) for the effect of increasing blood cell counts or cell type ratios on disease risk. MR Egger results are only presented for phenotypes with evidence of directional horizontal pleiotropy (MR Egger intercept  $\beta_0 \neq 0$  ( $p < 0.05$ )).

| Blood Trait | MR Estimator       | N <sub>SNP</sub> | IDH <sub>wt</sub> |               |       |
|-------------|--------------------|------------------|-------------------|---------------|-------|
|             |                    |                  | OR                | (95% CI)      | P     |
| Basophils   | IVW-MRE            | 146              | 0.87              | (0.56 – 1.36) | 0.54  |
|             | Maximum likelihood |                  | 0.87              | (0.55 – 1.37) | 0.54  |
|             | Weighted median    |                  | 0.81              | (0.40 – 1.62) | 0.55  |
|             | RAPS               |                  | 0.86              | (0.54 – 1.38) | 0.53  |
|             | PRESSO             |                  | 0.87              | (0.56 – 1.36) | 0.54  |
| Eosinophils | IVW-MRE            | 370              | 0.98              | (0.80 – 1.19) | 0.81  |
|             | Maximum likelihood |                  | 0.98              | (0.80 – 1.19) | 0.81  |
|             | Weighted median    |                  | 1.13              | (0.83 – 1.53) | 0.45  |
|             | RAPS               |                  | 1.02              | (0.82 – 1.25) | 0.88  |
|             | PRESSO             |                  | 0.98              | (0.80 – 1.19) | 0.81  |
| Lymphocytes | IVW-MRE            | 414              | 1.05              | (0.89 – 1.23) | 0.59  |
|             | Maximum likelihood |                  | 1.05              | (0.89 – 1.23) | 0.58  |
|             | Weighted median    |                  | 1.19              | (0.85 – 1.67) | 0.31  |
|             | RAPS               |                  | 1.05              | (0.88 – 1.25) | 0.57  |
|             | PRESSO             |                  | 1.05              | (0.89 – 1.23) | 0.59  |
| Monocytes   | IVW-MRE            | 479              | 1.04              | (1.00 – 1.07) | 0.058 |
|             | Maximum likelihood |                  | 1.04              | (1.00 – 1.07) | 0.052 |
|             | Weighted median    |                  | 1.04              | (1.00 – 1.08) | 0.036 |
|             | RAPS               |                  | 1.04              | (1.00 – 1.08) | 0.056 |
|             | PRESSO             |                  | 1.04              | (1.00 – 1.07) | 0.058 |
| Neutrophils | IVW-MRE            | 296              | 1.03              | (0.78 – 1.38) | 0.82  |
|             | Maximum likelihood |                  | 1.03              | (0.82 – 1.31) | 0.78  |
|             | Weighted median    |                  | 0.87              | (0.60 – 1.26) | 0.45  |
|             | RAPS               |                  | 1.00              | (0.76 – 1.30) | 0.98  |
|             | PRESSO             |                  | 0.94              | (0.74 – 1.21) | 0.65  |
| Platelets   | IVW-MRE            | 668              | 1.03              | (0.97 – 1.10) | 0.37  |
|             | Maximum likelihood |                  | 1.03              | (0.97 – 1.09) | 0.33  |
|             | Weighted median    |                  | 1.00              | (0.94 – 1.07) | 0.93  |
|             | RAPS               |                  | 1.03              | (0.96 – 1.09) | 0.42  |
|             | PRESSO             |                  | 1.02              | (0.96 – 1.08) | 0.49  |
| LMR         | IVW-MRE            | 450              | 1.08              | (0.89 – 1.30) | 0.44  |
|             | Maximum likelihood |                  | 1.08              | (0.90 – 1.29) | 0.41  |
|             | Weighted median    |                  | 1.01              | (0.74 – 1.38) | 0.96  |
|             | RAPS               |                  | 1.03              | (0.85 – 1.26) | 0.76  |

|     |                    |     |      |               |       |
|-----|--------------------|-----|------|---------------|-------|
| NLR | PRESSO             | 249 | 1.08 | (0.90 – 1.29) | 0.44  |
|     | IVW-MRE            |     | 0.96 | (0.71 – 1.30) | 0.81  |
|     | Maximum likelihood |     | 0.96 | (0.74 – 1.26) | 0.79  |
|     | Weighted median    |     | 0.97 | (0.64 – 1.48) | 0.90  |
|     | RAPS               |     | 0.93 | (0.69 – 1.25) | 0.62  |
|     | MR Egger           |     | 0.42 | (0.18 – 0.93) | 0.034 |
|     | PRESSO             |     | 0.89 | (0.68 – 1.18) | 0.43  |
| PLR | IVW-MRE            | 470 | 1.23 | (1.01 – 1.49) | 0.036 |
|     | Maximum likelihood |     | 1.23 | (1.04 – 1.47) | 0.017 |
|     | Weighted median    |     | 1.07 | (0.80 – 1.43) | 0.64  |
|     | RAPS               |     | 1.21 | (1.00 – 1.47) | 0.051 |
|     | MR Egger           |     | 0.83 | (0.53 – 1.30) | 0.42  |
|     | PRESSO             |     | 1.19 | (1.00 – 1.42) | 0.055 |

Abbreviations:

IVW-MRE Inverse variance weighted multiplicative random effect

RAPS Robust adjusted profile score

PRESSO Pleiotropy Residual Sum and Outlier

LMR Lymphocyte to monocyte ratio

NLR Neutrophil to lymphocyte ratio

PLR Platelet to lymphocyte ratio



**Supplementary Table S5: Mendelian randomization results following manual removal of invalid genetic instruments.** Odds ratios (OR) and 95% for glioma for selected traits were estimated after filtering instruments that contributed to significant heterogeneity.

| Blood Cell Trait | Outcome                                               | N / N <sub>SNP</sub> | OR   | IVW-MRE       | P                    | Diagnostics          |                    |
|------------------|-------------------------------------------------------|----------------------|------|---------------|----------------------|----------------------|--------------------|
|                  |                                                       |                      |      | (95% CI)      |                      | P <sub>Q-value</sub> | P <sub>Egger</sub> |
| PLR              | Glioma overall                                        | 442 / 470            | 1.27 | (1.12 – 1.44) | 2.2×10 <sup>-4</sup> | 0.98                 | 0.18               |
| PLR              | IDH <sub>mut</sub>                                    | 425 / 470            | 1.45 | (1.18 – 1.77) | 3.1×10 <sup>-4</sup> | 0.99                 | 0.40               |
| PLR              | 1p/19q non-codeleted (IDH <sub>mut-noncodelet</sub> ) | 434 / 470            | 1.53 | (1.19 – 1.96) | 8.1×10 <sup>-4</sup> | 0.99                 | 0.11               |
| Lymphocytes      | IDH <sub>mut</sub>                                    | 388 / 414            | 0.68 | (0.55 – 0.83) | 1.8×10 <sup>-4</sup> | 0.99                 | 0.52               |
| Lymphocytes      | 1p/19q non-codeleted (IDH <sub>mut-noncodelet</sub> ) | 391 / 414            | 0.69 | (0.55 – 0.85) | 4.5×10 <sup>-4</sup> | 0.99                 | 0.20               |
| Neutrophils      | IDH <sub>mut</sub>                                    | 271 / 296            | 0.65 | (0.50 – 0.85) | 1.4×10 <sup>-3</sup> | 0.97                 | 0.16               |
| Neutrophils      | 1p/19q non-codeleted (IDH <sub>mut-noncodelet</sub> ) | 278 / 296            | 0.61 | (0.43 – 0.86) | 5.2×10 <sup>-3</sup> | 0.73                 | 0.51               |

Abbreviations:

IVW-MRE Inverse variance weighted multiplicative random effect

PLR Platelet to lymphocyte ratio

**Supplementary Table S6: Multivariable (MV) Mendelian randomization results.** Odds ratios (OR) and 95% for glioma, estimated using MVMR for traits that were individually associated with specific glioma subtypes or were used to derive associated ratio phenotypes.

| Outcome                     | Traits Included | MV Method | Association Estimates |               |       |
|-----------------------------|-----------------|-----------|-----------------------|---------------|-------|
|                             |                 |           | OR                    | (95% CI)      | P     |
| IDH <sub>mut</sub>          | Lymphocytes     | IVW       | 0.78                  | (0.58 – 1.06) | 0.11  |
|                             | Neutrophils     | IVW       | 1.08                  | (0.91 – 1.28) | 0.37  |
|                             | Platelets       | IVW       | 1.09                  | (0.91 – 1.30) | 0.36  |
|                             | PLR             | LASSO     | 1.11                  |               |       |
|                             | Lymphocytes     | LASSO     | -                     |               |       |
|                             | Neutrophils     | LASSO     | 0.86                  |               |       |
|                             | Platelets       | LASSO     | -                     |               |       |
| IDH <sub>mut-noncode1</sub> | Lymphocytes     | IVW       | 0.70                  | (0.48 – 1.00) | 0.051 |
|                             | Neutrophils     | IVW       | 1.12                  | (0.91 – 1.40) | 0.27  |
|                             | Platelets       | IVW       | 1.10                  | (0.89 – 1.37) | 0.36  |
|                             | PLR             | LASSO     | 1.16                  |               |       |
|                             | Lymphocytes     | LASSO     | 0.89                  |               |       |
|                             | Neutrophils     | LASSO     | 0.90                  |               |       |
|                             | Platelets       | LASSO     | -                     |               |       |

**Supplementary Table S7: Candidate variants for colocalization.** Genome-wide significant glioma risk variants identified among genetic instruments for blood cell traits. For each variant associations with all blood cell phenotypes and/or leukocyte telomere length that reached genome-wide significance are shown.

| Region   | SNP <sup>1</sup>    | Outcome                             | OR   | P-value               | P-values for associated traits |                        |            |                       |
|----------|---------------------|-------------------------------------|------|-----------------------|--------------------------------|------------------------|------------|-----------------------|
| 2q37.3   | rs34290285<br>(G/A) | IDH <sub>mut</sub> 1p/19q non-codel | 0.60 | 5.2×10 <sup>-10</sup> | Eosinophils:                   | 3.9×10 <sup>-37</sup>  |            |                       |
|          |                     | IDH <sub>mut</sub>                  | 0.66 | 1.6×10 <sup>-9</sup>  |                                |                        |            |                       |
| 5p15.33  | rs7705526<br>(C/A)  | IDH <sub>wt</sub>                   | 0.60 | 6.7×10 <sup>-25</sup> | Neutrophils:                   | 1.3×10 <sup>-12</sup>  |            |                       |
|          |                     | IDH <sub>wt</sub>                   | 0.60 | 6.7×10 <sup>-25</sup> | NLR:                           | 1.4×10 <sup>-9</sup>   |            |                       |
|          |                     | Glioma overall                      | 0.68 | 2.2×10 <sup>-23</sup> | PLR:                           | 2.7×10 <sup>-12</sup>  |            |                       |
| 5p15.33  | rs2853677<br>(G/A)  | Glioma overall                      | 1.25 | 1.2×10 <sup>-9</sup>  | Platelets:                     | 9.9×10 <sup>-33</sup>  |            |                       |
|          |                     |                                     |      |                       | Neutrophils:                   | 2.4×10 <sup>-282</sup> |            |                       |
|          |                     |                                     |      |                       | NLR:                           | 2.2×10 <sup>-11</sup>  |            |                       |
|          |                     |                                     |      |                       | PLR:                           | 5.7×10 <sup>-14</sup>  |            |                       |
|          |                     |                                     |      |                       | Telomere length:               | 3.2×10 <sup>-12</sup>  |            |                       |
| 8q24     | rs72716319<br>(A/G) | IDH <sub>mut</sub>                  | 0.27 | 2.5×10 <sup>-41</sup> | LMR:                           | 5.3×10 <sup>-21</sup>  |            |                       |
|          |                     | IDH <sub>mut</sub> 1p/19q non-codel | 0.27 | 5.2×10 <sup>-29</sup> |                                |                        |            |                       |
|          |                     | Glioma overall                      | 0.47 | 6.2×10 <sup>-24</sup> |                                |                        | Monocytes: | 4.0×10 <sup>-21</sup> |
|          |                     | IDH <sub>mut</sub> 1p/19q co-del    | 0.26 | 1.5×10 <sup>-23</sup> |                                |                        |            |                       |
| 8q24     | rs55705857<br>(A/G) | IDH <sub>mut</sub>                  | 0.24 | 3.0×10 <sup>-55</sup> | LMR:                           | 1.0×10 <sup>-22</sup>  |            |                       |
|          |                     | IDH <sub>mut</sub> 1p/19q co-del    | 0.20 | 8.9×10 <sup>-37</sup> |                                |                        |            |                       |
|          |                     | IDH <sub>mut</sub> 1p/19q non-codel | 0.25 | 2.7×10 <sup>-34</sup> |                                |                        | Monocytes: | 1.6×10 <sup>-19</sup> |
|          |                     | Glioma overall                      | 0.44 | 3.1×10 <sup>-32</sup> |                                |                        |            |                       |
| 8q24     | rs16904140<br>(G/A) | IDH <sub>mut</sub>                  | 0.57 | 1.3×10 <sup>-19</sup> | LMR:                           | 6.1×10 <sup>-21</sup>  |            |                       |
|          |                     | IDH <sub>mut</sub> 1p/19q co-del    | 0.48 | 2.0×10 <sup>-17</sup> |                                |                        |            |                       |
|          |                     | Glioma overall                      | 0.76 | 1.5×10 <sup>-10</sup> |                                |                        | Monocytes: | 2.2×10 <sup>-17</sup> |
|          |                     | IDH <sub>mut</sub> 1p/19q non-codel | 0.64 | 4.8×10 <sup>-9</sup>  |                                |                        | Platelets: | 1.1×10 <sup>-8</sup>  |
| 20q13.33 | rs4809319<br>(A/G)  | IDH <sub>wt</sub>                   | 0.62 | 1.3×10 <sup>-14</sup> | Platelets:                     | 1.1×10 <sup>-9</sup>   |            |                       |
|          |                     | Glioma overall                      | 0.71 | 1.4×10 <sup>-13</sup> | Telomere length:               | 1.1×10 <sup>-19</sup>  |            |                       |

<sup>1</sup> Alleles are listed as effect allele/other allele, where the odds ratio corresponds to the effect allele

**Supplementary Table S8: Colocalization results.** Regions with evidence of colocalization, denoted by posterior probability (PP)>0.90 between signals for glioma susceptibility and putative risk factors.

| Locus    | Candidate                       | Colocalized Traits                                                  | Dropped Traits  | PP <sup>1</sup> | PP <sub>regional</sub> <sup>2</sup> | Fine-mapped <sup>3</sup>      | PP <sub>SNP</sub> |
|----------|---------------------------------|---------------------------------------------------------------------|-----------------|-----------------|-------------------------------------|-------------------------------|-------------------|
| 2q37.3   | rs34290285<br>( <i>D2HGDH</i> ) | IDH <sub>mut</sub> 1p/19q non-codel,<br>Eosinophils                 | -               | 0.939           | 1                                   | rs34290285                    | 0.944             |
| 5p15.33  | rs7705526<br>( <i>TERT</i> )    | IDH <sub>wt</sub> , telomere length,<br>platelets, neutrophils, PLR | -               | 0.994           | 1                                   | rs7705526                     | 1                 |
| 5p15.33  | rs2853677<br>( <i>TERT</i> )    | Glioma, telomere length,<br>platelets                               | -               | 0.978           | 1                                   | rs7705526                     | 1                 |
| 20q13.33 | rs4809319<br>( <i>STMN3</i> )   | None                                                                | Telomere length | -               | 0.665                               | -                             | -                 |
|          |                                 | IDH <sub>wt</sub> , platelets                                       | -               | 0.952           | 1                                   | rs6011018<br>( <i>RTEL1</i> ) | 0.178             |

<sup>1</sup> Posterior probability that all traits are colocalized

<sup>2</sup> Posterior probability that one or more SNPs in the region have shared associations across the traits

<sup>3</sup> Candidate variant explaining the shared association

<sup>4</sup> Proportion of the posterior probability explained by the fine-mapped variant

Abbreviations:

PP            Posterior probability

**Supplementary Table S9: Survival analysis of blood cell trait polygenic scores (PGS).** Hazard ratios (HR) and 95% confidence intervals per 1 standard deviation increase in the standardized PGS were estimated using Cox proportional hazards models fit separately in each patient population. Associations of each PGS with all-cause mortality were estimated with adjustment for age, sex, and top 10 genetic ancestry principal components.

| Blood Cell PGS | Cases (Events)                  | UCSF AGS and Mayo Clinic |               |                      | UCSF AGS                          |               |               | TCGA |                                   |               |               |       |
|----------------|---------------------------------|--------------------------|---------------|----------------------|-----------------------------------|---------------|---------------|------|-----------------------------------|---------------|---------------|-------|
|                |                                 | HR                       | (95% CI)      | P                    | HR                                | (95% CI)      | P             | HR   | (95% CI)                          | P             |               |       |
| Basophils      |                                 | 1.02                     | (0.97 – 1.08) | 0.43                 | 1.01                              | (0.93 – 1.09) | 0.83          | 1.14 | (1.00 – 1.14)                     | 0.042         |               |       |
| Eosinophils    |                                 | 0.99                     | (0.93 – 1.05) | 0.73                 | 1.04                              | (0.96 – 1.13) | 0.30          | 1.03 | (0.92 – 1.16)                     | 0.64          |               |       |
| Lymphocytes    |                                 | 1.02                     | (0.96 – 1.08) | 0.48                 | 1.00                              | (0.93 – 1.09) | 0.94          | 1.14 | (1.01 – 1.29)                     | 0.030         |               |       |
| Monocytes      | Glioma<br>1973<br>(1218)        | 1.00                     | (0.95 – 1.06) | 0.89                 | Glioma<br>659<br>(592)            | 1.01          | (0.93 – 1.10) | 0.83 | Glioma<br>786<br>(310)            | 0.93          | (0.83 – 1.03) | 0.17  |
| Neutrophils    |                                 | 1.05                     | (0.99 – 1.11) | 0.12                 |                                   | 0.97          | (0.90 – 1.05) | 0.43 |                                   | 1.07          | (0.95 – 1.21) | 0.26  |
| Platelets      |                                 | 1.01                     | (0.96 – 1.07) | 0.65                 |                                   | 1.05          | (0.97 – 1.14) | 0.23 |                                   | 0.98          | (0.88 – 1.09) | 0.72  |
| LMR            |                                 | 0.96                     | (0.91 – 1.02) | 0.21                 |                                   | 1.00          | (0.92 – 1.09) | 0.98 |                                   | 1.10          | (0.99 – 1.23) | 0.090 |
| NLR            |                                 | 1.00                     | (0.95 – 1.06) | 0.94                 |                                   | 0.96          | (0.88 – 1.04) | 0.29 | 0.87                              | (0.78 – 0.97) | 0.013         |       |
| PLR            |                                 | 0.97                     | (0.91 – 1.02) | 0.24                 |                                   | 1.00          | (0.92 – 1.08) | 0.97 | 0.95                              | (0.85 – 1.06) | 0.36          |       |
| Basophils      |                                 | 1.11                     | (0.96 – 1.28) | 0.18                 |                                   | 1.00          | (0.78 – 1.29) | 0.99 | 1.70                              | (1.22 – 2.37) | 1.8E-03       |       |
| Eosinophils    |                                 | 1.17                     | (1.00 – 1.37) | 0.055                |                                   | 0.89          | (0.70 – 1.14) | 0.36 | 1.18                              | (0.86 – 1.61) | 0.31          |       |
| Lymphocytes    |                                 | 1.09                     | (0.94 – 1.27) | 0.26                 |                                   | 0.99          | (0.78 – 1.25) | 0.91 | 1.42                              | (1.03 – 1.95) | 0.030         |       |
| Monocytes      | IDH <sub>mut</sub><br>588 (201) | 0.98                     | (0.85 – 1.13) | 0.79                 | IDH <sub>mut</sub><br>111<br>(74) | 0.79          | (0.59 – 1.06) | 0.11 | IDH <sub>mut</sub><br>375<br>(50) | 0.86          | (0.63 – 1.18) | 0.35  |
| Neutrophils    |                                 | 1.12                     | (0.96 – 1.31) | 0.15                 |                                   | 0.95          | (0.76 – 1.19) | 0.66 |                                   | 1.35          | (1.00 – 1.82) | 0.051 |
| Platelets      |                                 | 1.04                     | (0.90 – 1.20) | 0.58                 |                                   | 0.96          | (0.76 – 1.21) | 0.72 |                                   | 1.09          | (0.83 – 1.45) | 0.53  |
| LMR            |                                 | 0.93                     | (0.80 – 1.07) | 0.30                 |                                   | 1.06          | (0.83 – 1.36) | 0.64 |                                   | 1.32          | (0.96 – 1.81) | 0.083 |
| NLR            |                                 | 0.91                     | (0.80 – 1.05) | 0.20                 |                                   | 0.95          | (0.76 – 1.19) | 0.67 | 0.76                              | (0.56 – 1.03) | 0.073         |       |
| PLR            |                                 | 0.93                     | (0.81 – 1.08) | 0.34                 |                                   | 0.88          | (0.70 – 1.10) | 0.25 | 0.84                              | (0.60 – 1.16) | 0.29          |       |
| Basophils      |                                 | 1.33                     | (1.00 – 1.77) | 0.047                |                                   | -             | -             | -    | 2.59                              | (1.04 – 6.41) | 0.040         |       |
| Eosinophils    |                                 | 1.56                     | (1.15 – 2.13) | 4.4×10 <sup>-3</sup> |                                   | -             | -             | -    | 1.94                              | (0.60 – 6.32) | 0.27          |       |

|             |                              |      |               |                      |                              |      |               |       |                              |      |                |         |
|-------------|------------------------------|------|---------------|----------------------|------------------------------|------|---------------|-------|------------------------------|------|----------------|---------|
| Lymphocytes |                              | 1.68 | (1.24 – 2.27) | 7.4×10 <sup>-4</sup> |                              | -    | -             | -     |                              | 1.38 | (0.50 – 3.81)  | 0.53    |
| Monocytes   |                              | 1.22 | (0.94 – 1.59) | 0.13                 |                              | -    | -             | -     |                              | 1.71 | (0.65 – 4.48)  | 0.28    |
| Neutrophils | IDH <sub>mut</sub><br>1p/19q | 1.37 | (1.03 – 1.83) | 0.033                | IDH <sub>mut</sub><br>1p/19q | -    | -             | -     | IDH <sub>mut</sub><br>1p/19q | 4.82 | (1.63 – 14.29) | 4.5E-03 |
| platelet    | co-del                       | 0.80 | (0.61 – 1.05) | 0.11                 | co-del                       | -    | -             | -     | co-del                       | 1.50 | (0.59 – 3.80)  | 0.39    |
| LMR         | 244<br>(64)                  | 0.99 | (0.77 – 1.29) | 0.97                 | 9<br>(1)                     | -    | -             | -     | 143<br>(13)                  | 1.42 | (0.58 – 3.46)  | 0.44    |
| NLR         |                              | 0.83 | (0.64 – 1.07) | 0.15                 |                              | -    | -             | -     |                              | 1.78 | (0.73 – 4.35)  | 0.20    |
| PLR         |                              | 0.83 | (0.63 – 1.08) | 0.17                 |                              | -    | -             | -     |                              | 0.87 | (0.40 – 1.91)  | 0.73    |
| Basophils   |                              | 1.13 | (0.93 – 1.39) | 0.22                 |                              | 1.09 | (0.84 – 1.41) | 0.51  |                              | 1.63 | (1.08 – 2.45)  | 0.019   |
| Eosinophils |                              | 1.08 | (0.88 – 1.32) | 0.46                 |                              | 0.97 | (0.75 – 1.25) | 0.79  |                              | 1.15 | (0.81 – 1.64)  | 0.43    |
| Lymphocytes |                              | 1.02 | (0.84 – 1.24) | 0.86                 |                              | 1.11 | (0.87 – 1.41) | 0.41  |                              | 1.33 | (0.85 – 2.07)  | 0.21    |
| Monocytes   | IDH <sub>mut</sub><br>1p/19q | 1.04 | (0.85 – 1.28) | 0.67                 | IDH <sub>mut</sub><br>1p/19q | 0.87 | (0.64 – 1.20) | 0.41  | IDH <sub>mut</sub><br>1p/19q | 0.64 | (0.42 – 0.99)  | 0.045   |
| Neutrophils | non-codel                    | 1.03 | (0.85 – 1.26) | 0.75                 | non-codel                    | 1.03 | (0.83 – 1.28) | 0.78  | non-codel                    | 1.14 | (0.77 – 1.68)  | 0.51    |
| Platelets   | 291<br>(117)                 | 1.04 | (0.86 – 1.27) | 0.67                 | 94<br>(69)                   | 0.90 | (0.70 – 1.15) | 0.41  | 230<br>(36)                  | 0.99 | (0.70 – 1.39)  | 0.94    |
| LMR         |                              | 0.95 | (0.79 – 1.14) | 0.57                 |                              | 1.11 | (0.85 – 1.43) | 0.44  |                              | 1.35 | (0.92 – 1.96)  | 0.12    |
| NLR         |                              | 0.88 | (0.73 – 1.07) | 0.19                 |                              | 0.89 | (0.71 – 1.11) | 0.29  |                              | 0.70 | (0.43 – 1.13)  | 0.15    |
| PLR         |                              | 0.96 | (0.80 – 1.15) | 0.66                 |                              | 0.83 | (0.65 – 1.06) | 0.13  |                              | 0.83 | (0.53 – 1.30)  | 0.42    |
| Basophils   |                              | 1.00 | (0.93 – 1.09) | 0.91                 |                              | 1.04 | (0.94 – 1.14) | 0.44  |                              | 1.11 | (0.95 – 1.29)  | 0.18    |
| Eosinophils |                              | 0.95 | (0.87 – 1.04) | 0.25                 |                              | 1.07 | (0.97 – 1.18) | 0.18  |                              | 1.09 | (0.95 – 1.25)  | 0.23    |
| Lymphocytes |                              | 1.04 | (0.96 – 1.13) | 0.32                 |                              | 1.01 | (0.91 – 1.11) | 0.91  |                              | 1.09 | (0.94 – 1.26)  | 0.23    |
| Monocytes   | IDH <sub>wt</sub>            | 0.98 | (0.91 – 1.06) | 0.64                 | IDH <sub>wt</sub>            | 1.03 | (0.93 – 1.13) | 0.57  | IDH <sub>wt</sub>            | 0.89 | (0.78 – 1.01)  | 0.073   |
| Neutrophils | 699<br>(594)                 | 1.02 | (0.94 – 1.10) | 0.69                 | 416<br>(402)                 | 0.99 | (0.90 – 1.08) | 0.81  | 364<br>(228)                 | 0.99 | (0.86 – 1.15)  | 0.91    |
| Platelets   |                              | 1.03 | (0.95 – 1.11) | 0.53                 |                              | 1.10 | (1.00 – 1.22) | 0.061 |                              | 0.90 | (0.79 – 1.02)  | 0.11    |
| LMR         |                              | 1.00 | (0.92 – 1.09) | 0.96                 |                              | 0.95 | (0.86 – 1.05) | 0.33  |                              | 1.09 | (0.96 – 1.24)  | 0.16    |
| NLR         |                              | 1.01 | (0.93 – 1.10) | 0.85                 |                              | 0.99 | (0.89 – 1.10) | 0.86  |                              | 0.92 | (0.81 – 1.04)  | 0.16    |
| PLR         |                              | 0.95 | (0.87 – 1.03) | 0.20                 |                              | 1.04 | (0.94 – 1.15) | 0.44  |                              | 0.92 | (0.80 – 1.05)  | 0.19    |

**Supplementary Table S10: Meta-analysis of blood cell trait polygenic scores (PGS) associations.**

Study specific results in Supplementary Table S9 were combined in a fixed-effects meta-analysis to estimate the overall effect of each blood cell trait PGS on survival. Hazard ratios (HR) correspond to a 1 standard deviation increase in the standardized PGS.

| Blood Cell PGS | Cases (Events)                          | Meta-Analysis Estimates |               |                      |                      | Heterogeneity <sup>2</sup> |                |
|----------------|-----------------------------------------|-------------------------|---------------|----------------------|----------------------|----------------------------|----------------|
|                |                                         | HR                      | (95% CI)      | P                    | FDR <sup>1</sup>     | Q P-value                  | I <sup>2</sup> |
| Basophils      | Glioma:<br>3418<br>(2120)               | 1.03                    | (0.99 – 1.08) | 0.15                 | 0.47                 | 0.25                       | 0.27           |
| Eosinophils    |                                         | 1.01                    | (0.97 – 1.06) | 0.62                 | 0.79                 | 0.56                       | 0              |
| Lymphocytes    |                                         | 1.03                    | (0.99 – 1.08) | 0.17                 | 0.47                 | 0.19                       | 0.41           |
| Monocytes      |                                         | 0.99                    | (0.95 – 1.04) | 0.75                 | 0.80                 | 0.39                       | 0              |
| Neutrophils    |                                         | 1.03                    | (0.98 – 1.07) | 0.26                 | 0.47                 | 0.21                       | 0.36           |
| Platelets      |                                         | 1.02                    | (0.98 – 1.06) | 0.41                 | 0.61                 | 0.57                       | 0              |
| LMR            |                                         | 0.99                    | (0.95 – 1.04) | 0.80                 | 0.80                 | 0.11                       | 0.54           |
| NLR            |                                         | 0.97                    | (0.93 – 1.01) | 0.14                 | 0.47                 | 0.079                      | 0.61           |
| PLR            |                                         | 0.97                    | (0.93 – 1.02) | 0.21                 | 0.47                 | 0.72                       | 0              |
| Basophils      | IDH <sub>mut</sub><br>1074<br>(325)     | 1.14                    | (1.02 – 1.29) | 0.027                | 0.19                 | 0.035                      | 0.70           |
| Eosinophils    |                                         | 1.09                    | (0.97 – 1.24) | 0.16                 | 0.24                 | 0.17                       | 0.44           |
| Lymphocytes    |                                         | 1.10                    | (0.98 – 1.24) | 0.10                 | 0.19                 | 0.19                       | 0.40           |
| Monocytes      |                                         | 0.93                    | (0.82 – 1.05) | 0.22                 | 0.28                 | 0.37                       | 0              |
| Neutrophils    |                                         | 1.10                    | (0.98 – 1.24) | 0.11                 | 0.19                 | 0.18                       | 0.42           |
| Platelets      |                                         | 1.03                    | (0.92 – 1.15) | 0.60                 | 0.68                 | 0.75                       | 0              |
| LMR            |                                         | 1.00                    | (0.89 – 1.12) | 0.99                 | 1.00                 | 0.11                       | 0.54           |
| NLR            |                                         | 0.90                    | (0.81 – 1.01) | 0.063                | 0.19                 | 0.46                       | 0              |
| PLR            |                                         | 0.91                    | (0.81 – 1.02) | 0.089                | 0.19                 | 0.79                       | 0              |
| Basophils      | IDH <sub>mut-codel</sub><br>396<br>(78) | 1.42                    | (1.08 – 1.86) | 0.012                | 0.03                 | 0.17                       | 0.46           |
| Eosinophils    |                                         | 1.59                    | (1.18 – 2.14) | 2.4×10 <sup>-3</sup> | 0.011                | 0.73                       | 0              |
| Lymphocytes    |                                         | 1.65                    | (1.24 – 2.20) | 6.4×10 <sup>-4</sup> | 5.8×10 <sup>-3</sup> | 0.72                       | 0              |
| Monocytes      |                                         | 1.25                    | (0.97 – 1.61) | 0.079                | 0.14                 | 0.51                       | 0              |
| Neutrophils    |                                         | 1.49                    | (1.13 – 1.97) | 5.2×10 <sup>-3</sup> | 0.016                | 0.029                      | 0.79           |
| platelet       |                                         | 0.84                    | (0.65 – 1.09) | 0.20                 | 0.25                 | 0.20                       | 0.38           |
| LMR            |                                         | 1.02                    | (0.80 – 1.32) | 0.85                 | 0.85                 | 0.45                       | 0              |
| NLR            |                                         | 0.88                    | (0.69 – 1.13) | 0.31                 | 0.34                 | 0.11                       | 0.62           |
| PLR            |                                         | 0.83                    | (0.64 – 1.07) | 0.16                 | 0.23                 | 0.90                       | 0              |
| Basophils      |                                         | 1.17                    | (1.01 – 1.36) | 0.033                | 0.30                 | 0.23                       | 0.32           |
| Eosinophils    |                                         | 1.05                    | (0.91 – 1.22) | 0.48                 | 0.68                 | 0.68                       | 0              |

|             |                                                    |      |               |      |      |       |      |
|-------------|----------------------------------------------------|------|---------------|------|------|-------|------|
| Lymphocytes | IDH <sub>mut-<br/>noncode1<br/>615<br/>(222)</sub> | 1.08 | (0.93 – 1.25) | 0.31 | 0.68 | 0.55  | 0    |
| Monocytes   |                                                    | 0.93 | (0.80 – 1.10) | 0.41 | 0.68 | 0.12  | 0.52 |
| Neutrophils |                                                    | 1.04 | (0.91 – 1.20) | 0.53 | 0.68 | 0.90  | 0    |
| Platelets   |                                                    | 0.99 | (0.86 – 1.14) | 0.84 | 0.95 | 0.66  | 0    |
| LMR         |                                                    | 1.00 | (0.87 – 1.15) | 0.98 | 0.98 | 0.10  | 0.57 |
| NLR         |                                                    | 0.90 | (0.79 – 1.03) | 0.14 | 0.43 | 0.49  | 0    |
| PLR         |                                                    | 0.90 | (0.78 – 1.04) | 0.14 | 0.43 | 0.60  | 0    |
| Basophils   | IDH <sub>wt<br/>1479<br/>(1224)</sub>              | 1.03 | (0.97 – 1.09) | 0.30 | 0.71 | 0.52  | 0    |
| Eosinophils |                                                    | 1.02 | (0.96 – 1.08) | 0.59 | 0.76 | 0.12  | 0.53 |
| Lymphocytes |                                                    | 1.04 | (0.98 – 1.10) | 0.21 | 0.71 | 0.64  | 0    |
| Monocytes   |                                                    | 0.98 | (0.93 – 1.03) | 0.44 | 0.71 | 0.21  | 0.36 |
| Neutrophils |                                                    | 1.00 | (0.95 – 1.06) | 0.93 | 0.93 | 0.89  | 0    |
| Platelets   |                                                    | 1.02 | (0.97 – 1.08) | 0.44 | 0.71 | 0.052 | 0.66 |
| LMR         |                                                    | 1.01 | (0.95 – 1.07) | 0.81 | 0.91 | 0.24  | 0.31 |
| NLR         |                                                    | 0.98 | (0.92 – 1.04) | 0.47 | 0.71 | 0.48  | 0    |
| PLR         |                                                    | 0.97 | (0.92 – 1.03) | 0.31 | 0.71 | 0.24  | 0.30 |

<sup>1</sup> False discovery rate (FDR) was calculated for each glioma subtype, FDR<0.05 was considered statistically significant

<sup>2</sup> Heterogeneity in study-specific associations was assessed using the standard Cochran's Q test (p<0.05 were considered statistically significant) and Higgins I<sup>2</sup> statistic, which describes the percentage of variation across studies that is due to heterogeneity rather than chance



**Supplementary Table S11: Mendelian randomization results for survival in *IDH*-mutated 1p19q co-deleted subtype.** Hazard ratios (HR) and 95% confidence intervals (CI) correspond to the effect of increasing blood cell counts or cell type ratios on all-cause mortality. Results are presented for analyses using SNP effects on survival before and after index event bias correction. MR Egger estimates are presented if applicable (Egger intercept test  $p < 0.05$ ).

| Blood Trait | MR Estimator       | N <sub>SNP</sub> <sup>1</sup> | Unadjusted |                 |                      | Adjusted for Index Event Bias |                |                      |
|-------------|--------------------|-------------------------------|------------|-----------------|----------------------|-------------------------------|----------------|----------------------|
|             |                    |                               | HR         | (95% CI)        | P                    | HR                            | (95% CI)       | P                    |
| Basophils   | IVW-MRE            | 143                           | 13.98      | (1.63 – 120.3)  | 0.016                | 13.18                         | (1.55 – 112.2) | 0.018                |
|             | Maximum likelihood |                               | 14.00      | (2.24 – 87.8)   | $4.8 \times 10^{-3}$ | 13.56                         | (2.16 – 85.2)  | $5.4 \times 10^{-3}$ |
|             | Weighted median    |                               | 46.24      | (2.10 – 1018.1) | 0.015                | 32.02                         | (1.32 – 779.0) | 0.033                |
|             | RAPS               |                               | 16.48      | (1.72 – 158.1)  | 0.015                | 15.05                         | (1.57 – 144.5) | 0.019                |
|             | PRESSO             |                               | 13.98      | (1.63 – 120.3)  | 0.017                | 13.18                         | (1.55 – 112.2) | 0.020                |
| Eosinophils | IVW-MRE            | 369                           | 3.83       | (1.63 – 9.00)   | $2.0 \times 10^{-3}$ | 3.87                          | (1.65 – 9.09)  | $1.9 \times 10^{-3}$ |
|             | Maximum likelihood |                               | 3.82       | (1.74 – 8.39)   | $8.5 \times 10^{-4}$ | 3.84                          | (1.74 – 8.45)  | $8.4 \times 10^{-4}$ |
|             | Weighted median    |                               | 5.15       | (1.35 – 19.68)  | 0.017                | 5.27                          | (1.35 – 20.62) | 0.017                |
|             | RAPS               |                               | 3.67       | (1.47 – 9.14)   | $5.3 \times 10^{-3}$ | 3.68                          | (1.47 – 9.20)  | $5.4 \times 10^{-3}$ |
|             | PRESSO             |                               | 3.83       | (1.63 – 9.00)   | $2.2 \times 10^{-3}$ | 3.87                          | (1.65 – 9.09)  | $2.1 \times 10^{-3}$ |
| Lymphocytes | IVW-MRE            | 411                           | 4.33       | (2.16 – 8.65)   | $3.4 \times 10^{-5}$ | 4.36                          | (2.18 – 8.73)  | $3.2 \times 10^{-5}$ |
|             | Maximum likelihood |                               | 4.40       | (2.21 – 8.77)   | $2.6 \times 10^{-5}$ | 4.41                          | (2.21 – 8.78)  | $2.5 \times 10^{-5}$ |
|             | Weighted median    |                               | 1.27       | (0.36 – 4.43)   | 0.71                 | 1.32                          | (0.36 – 4.81)  | 0.68                 |
|             | RAPS               |                               | 5.71       | (2.68 – 12.17)  | $6.6 \times 10^{-6}$ | 5.56                          | (2.61 – 11.85) | $9.0 \times 10^{-6}$ |
|             | PRESSO             |                               | 4.32       | (2.16 – 8.65)   | $4.2 \times 10^{-5}$ | 4.36                          | (2.18 – 8.73)  | $3.9 \times 10^{-5}$ |
| Monocytes   | IVW-MRE            | 473                           | 1.13       | (0.97 – 1.32)   | 0.11                 | 1.13                          | (0.97 – 1.32)  | 0.11                 |
|             | Maximum likelihood |                               | 1.13       | (0.98 – 1.30)   | 0.087                | 1.13                          | (0.98 – 1.30)  | 0.089                |
|             | Weighted median    |                               | 1.12       | (0.96 – 1.29)   | 0.15                 | 1.12                          | (0.97 – 1.28)  | 0.13                 |
|             | RAPS               |                               | 1.13       | (0.97 – 1.32)   | 0.12                 | 1.13                          | (0.97 – 1.32)  | 0.12                 |
|             | PRESSO             |                               | 1.13       | (0.97 – 1.32)   | 0.11                 | 1.13                          | (0.97 – 1.32)  | 0.11                 |
| Neutrophils | IVW-MRE            | 293                           | 4.71       | (1.72 – 12.91)  | $2.6 \times 10^{-3}$ | 4.51                          | (1.66 – 12.26) | $3.2 \times 10^{-3}$ |
|             | Maximum likelihood |                               | 4.70       | (1.85 – 11.96)  | $1.2 \times 10^{-3}$ | 4.50                          | (1.77 – 11.49) | $1.6 \times 10^{-3}$ |
|             | Weighted median    |                               | 5.33       | (1.21 – 23.46)  | 0.027                | 4.96                          | (1.07 – 22.98) | 0.041                |
|             | RAPS               |                               | 4.05       | (1.37 – 12.02)  | 0.012                | 3.87                          | (1.32 – 11.38) | 0.014                |
|             | MR Egger           |                               | 28.45      | (2.29 – 353.4)  | $9.7 \times 10^{-3}$ | 26.94                         | (2.22 – 327.5) | 0.010                |
|             | PRESSO             |                               | 4.71       | (1.72 – 12.91)  | $2.8 \times 10^{-3}$ | 4.51                          | (1.66 – 12.26) | $3.5 \times 10^{-3}$ |
| Platelets   | IVW-MRE            | 659                           | 0.84       | (0.67 – 1.05)   | 0.13                 | 0.83                          | (0.66 – 1.04)  | 0.10                 |
|             | Maximum likelihood |                               | 0.86       | (0.69 – 1.06)   | 0.16                 | 0.84                          | (0.67 – 1.04)  | 0.11                 |
|             | Weighted median    |                               | 0.77       | (0.58 – 1.03)   | 0.076                | 0.75                          | (0.57 – 1.00)  | 0.052                |
|             | RAPS               |                               | 0.83       | (0.65 – 1.07)   | 0.16                 | 0.82                          | (0.64 – 1.06)  | 0.13                 |
|             | PRESSO             |                               | 0.84       | (0.67 – 1.05)   | 0.13                 | 0.83                          | (0.66 – 1.04)  | 0.10                 |
| LMR         | IVW-MRE            | 446                           | 1.10       | (0.53 – 2.30)   | 0.80                 | 1.13                          | (0.54 – 2.36)  | 0.75                 |
|             | Maximum likelihood |                               | 1.10       | (0.54 – 2.23)   | 0.80                 | 1.13                          | (0.55 – 2.30)  | 0.74                 |

|     |                    |     |      |               |       |      |               |       |
|-----|--------------------|-----|------|---------------|-------|------|---------------|-------|
|     | Weighted median    |     | 0.88 | (0.26 – 2.98) | 0.83  | 0.90 | (0.26 – 3.04) | 0.86  |
|     | RAPS               |     | 1.02 | (0.48 – 2.20) | 0.95  | 1.06 | (0.49 – 2.29) | 0.88  |
|     | PRESSO             |     | 1.10 | (0.53 – 2.30) | 0.80  | 1.13 | (0.54 – 2.36) | 0.75  |
|     | IVW-MRE            |     | 0.50 | (0.16 – 1.56) | 0.23  | 0.50 | (0.16 – 1.58) | 0.24  |
|     | Maximum likelihood |     | 0.50 | (0.17 – 1.44) | 0.20  | 0.50 | (0.17 – 1.46) | 0.20  |
| NLR | Weighted median    | 248 | 0.91 | (0.17 – 4.83) | 0.91  | 0.71 | (0.13 – 3.90) | 0.70  |
|     | RAPS               |     | 0.47 | (0.14 – 1.54) | 0.21  | 0.48 | (0.15 – 1.60) | 0.23  |
|     | PRESSO             |     | 0.50 | (0.16 – 1.56) | 0.23  | 0.50 | (0.16 – 1.58) | 0.24  |
|     | IVW-MRE            |     | 0.50 | (0.24 – 1.04) | 0.065 | 0.51 | (0.25 – 1.07) | 0.074 |
|     | Maximum likelihood |     | 0.51 | (0.25 – 1.02) | 0.056 | 0.52 | (0.26 – 1.04) | 0.063 |
| PLR | Weighted median    | 465 | 0.53 | (0.17 – 1.65) | 0.27  | 0.67 | (0.22 – 2.06) | 0.49  |
|     | RAPS               |     | 0.50 | (0.23 – 1.09) | 0.082 | 0.52 | (0.24 – 1.12) | 0.10  |
|     | PRESSO             |     | 0.50 | (0.24 – 1.04) | 0.066 | 0.51 | (0.25 – 1.07) | 0.074 |

<sup>1</sup> Number of instruments using in the survival analysis is smaller due to the removal of variants with  $\text{abs}(\log(\text{HR})) > 2.5$

Abbreviations:

|         |                                                        |
|---------|--------------------------------------------------------|
| IVW-MRE | Inverse variance weighted multiplicative random effect |
| RAPS    | Robust adjusted profile score                          |
| PRESSO  | Pleiotropy Residual Sum and Outlier                    |
| LMR     | Lymphocyte to monocyte ratio                           |
| NLR     | Neutrophil to lymphocyte ratio                         |
| PLR     | Platelet to lymphocyte ratio                           |

**Supplementary Table S12: Associations between blood cell trait polygenic scores (PGS) and tumor immune microenvironment (TIME) features in TCGA.** Associations for selected blood cell trait PGS with heritable TIME traits identified in TCGA by Sayaman et al. (2021). Association analyses were conducted stratified by IDH mutation status. Each continuous TME phenotype was analyzed using linear regression with adjustment for age, sex, and genetic ancestry principal components. Heterogeneity in PGS effects by IDH status were assessed using Cochran's Q test.

| Module                    | TME Trait           | PGS         | IDH mutant |       |       |        | IDH wildtype |       |       |       | P <sub>het</sub> |
|---------------------------|---------------------|-------------|------------|-------|-------|--------|--------------|-------|-------|-------|------------------|
|                           |                     |             | Beta       | SE    | P     | FDR    | Beta         | SE    | P     | FDR   |                  |
| Expression Signature (ES) | Bcell mg IGJ        | Basophils   | -0.008     | 0.034 | 0.809 | 0.839  | 0.038        | 0.067 | 0.572 | 0.854 | 0.539            |
|                           |                     | Eosinophils | -0.005     | 0.036 | 0.885 | 0.991  | 0.008        | 0.061 | 0.896 | 0.939 | 0.852            |
|                           |                     | Lymphocytes | 0.032      | 0.036 | 0.366 | 0.528  | -0.024       | 0.064 | 0.701 | 0.818 | 0.437            |
|                           |                     | Neutrophils | 0.062      | 0.035 | 0.077 | 0.197  | -0.009       | 0.072 | 0.901 | 0.970 | 0.372            |
|                           |                     | Platelets   | -0.036     | 0.032 | 0.252 | 0.655  | -0.024       | 0.059 | 0.688 | 0.917 | 0.850            |
|                           |                     | PLR         | -0.046     | 0.033 | 0.166 | 0.307  | 0.034        | 0.063 | 0.587 | 0.748 | 0.258            |
|                           | CD8 CD68 ratio      | Basophils   | -0.083     | 0.069 | 0.232 | 0.719  | 0.086        | 0.077 | 0.262 | 0.854 | 0.101            |
|                           |                     | Eosinophils | 0.080      | 0.073 | 0.274 | 0.991  | 0.006        | 0.069 | 0.936 | 0.939 | 0.460            |
|                           |                     | Lymphocytes | -0.052     | 0.072 | 0.472 | 0.574  | 0.010        | 0.073 | 0.894 | 0.900 | 0.547            |
|                           |                     | Neutrophils | -0.0002    | 0.072 | 0.997 | 0.997  | 0.022        | 0.082 | 0.788 | 0.964 | 0.838            |
|                           |                     | Platelets   | -0.028     | 0.064 | 0.657 | 0.836  | -0.118       | 0.067 | 0.077 | 0.729 | 0.330            |
|                           |                     | PLR         | 0.108      | 0.067 | 0.112 | 0.223  | -0.055       | 0.072 | 0.442 | 0.652 | 0.098            |
|                           | LYMPHS PCA 16704732 | Basophils   | 0.027      | 0.020 | 0.179 | 0.719  | -0.026       | 0.040 | 0.514 | 0.854 | 0.235            |
|                           |                     | Eosinophils | 0.018      | 0.021 | 0.396 | 0.991  | -0.037       | 0.036 | 0.307 | 0.683 | 0.189            |
|                           |                     | Lymphocytes | 0.019      | 0.021 | 0.377 | 0.528  | -0.066       | 0.037 | 0.074 | 0.209 | 0.046            |
|                           |                     | Neutrophils | 0.026      | 0.021 | 0.221 | 0.428  | -0.060       | 0.042 | 0.155 | 0.964 | 0.068            |
|                           |                     | Platelets   | 0.023      | 0.019 | 0.217 | 0.655  | 0.053        | 0.034 | 0.123 | 0.729 | 0.449            |
|                           |                     | PLR         | -0.019     | 0.020 | 0.349 | 0.444  | 0.079        | 0.036 | 0.032 | 0.299 | 0.019            |
|                           | PD1                 | Basophils   | 0.041      | 0.053 | 0.443 | 0.719  | -0.057       | 0.072 | 0.427 | 0.854 | 0.273            |
|                           |                     | Eosinophils | 0.034      | 0.056 | 0.542 | 0.991  | -0.044       | 0.065 | 0.495 | 0.769 | 0.359            |
| Lymphocytes               |                     | 0.054       | 0.056      | 0.338 | 0.525 | -0.066 | 0.067        | 0.327 | 0.532 | 0.170 |                  |
| Neutrophils               |                     | 0.129       | 0.055      | 0.019 | 0.090 | -0.054 | 0.075        | 0.476 | 0.964 | 0.049 |                  |
| Platelets                 |                     | -0.031      | 0.050      | 0.534 | 0.732 | -0.032 | 0.062        | 0.599 | 0.883 | 0.984 |                  |

|                      |                                |             |        |       |       |        |        |       |       |       |         |
|----------------------|--------------------------------|-------------|--------|-------|-------|--------|--------|-------|-------|-------|---------|
|                      |                                | PLR         | -0.069 | 0.052 | 0.186 | 0.307  | 0.063  | 0.066 | 0.344 | 0.567 | 0.117   |
| IFN Response         | Activated Dendritic Cells (ES) | Basophils   | -0.004 | 0.034 | 0.903 | 0.903  | -0.019 | 0.055 | 0.723 | 0.854 | 0.813   |
|                      |                                | Eosinophils | -0.008 | 0.036 | 0.820 | 0.991  | -0.049 | 0.049 | 0.319 | 0.683 | 0.503   |
|                      |                                | Lymphocytes | 0.057  | 0.036 | 0.115 | 0.354  | -0.112 | 0.050 | 0.027 | 0.192 | 6.4E-03 |
|                      |                                | Neutrophils | 0.043  | 0.036 | 0.229 | 0.428  | -0.030 | 0.057 | 0.605 | 0.964 | 0.282   |
|                      |                                | Platelets   | -0.056 | 0.032 | 0.082 | 0.655  | 0.004  | 0.047 | 0.932 | 0.988 | 0.294   |
|                      |                                | PLR         | -0.091 | 0.033 | 0.007 | 0.164  | 0.109  | 0.050 | 0.030 | 0.299 | 8.9E-04 |
|                      |                                | Basophils   | -0.040 | 0.053 | 0.451 | 0.719  | -0.053 | 0.101 | 0.600 | 0.854 | 0.910   |
|                      | Attractor Metagene - IFIT3     | Eosinophils | -0.034 | 0.056 | 0.546 | 0.991  | -0.131 | 0.091 | 0.150 | 0.683 | 0.362   |
|                      |                                | Lymphocytes | 0.073  | 0.056 | 0.189 | 0.354  | -0.162 | 0.095 | 0.090 | 0.228 | 0.033   |
|                      |                                | Neutrophils | 0.031  | 0.055 | 0.572 | 0.794  | 0.048  | 0.107 | 0.658 | 0.964 | 0.892   |
|                      |                                | Platelets   | -0.075 | 0.049 | 0.131 | 0.655  | -0.110 | 0.087 | 0.209 | 0.729 | 0.723   |
|                      |                                | PLR         | -0.103 | 0.052 | 0.048 | 0.164  | 0.133  | 0.094 | 0.158 | 0.363 | 0.028   |
|                      | GP11 Immune IFN                | Basophils   | -0.005 | 0.016 | 0.760 | 0.828  | -0.012 | 0.024 | 0.606 | 0.854 | 0.796   |
|                      |                                | Eosinophils | 0.003  | 0.017 | 0.854 | 0.991  | -0.031 | 0.022 | 0.155 | 0.683 | 0.217   |
|                      |                                | Lymphocytes | 0.029  | 0.017 | 0.087 | 0.354  | -0.053 | 0.022 | 0.018 | 0.169 | 3.3E-03 |
|                      |                                | Neutrophils | 0.017  | 0.017 | 0.308 | 0.507  | 0.0004 | 0.026 | 0.986 | 0.986 | 0.585   |
|                      |                                | Platelets   | -0.017 | 0.015 | 0.270 | 0.655  | -0.021 | 0.021 | 0.309 | 0.729 | 0.856   |
|                      |                                | PLR         | -0.029 | 0.016 | 0.069 | 0.164  | 0.035  | 0.022 | 0.114 | 0.363 | 0.019   |
|                      | IFN signature 21978456         | Basophils   | -0.034 | 0.038 | 0.368 | 0.719  | -0.031 | 0.072 | 0.664 | 0.854 | 0.970   |
|                      |                                | Eosinophils | -0.026 | 0.040 | 0.510 | 0.991  | -0.083 | 0.064 | 0.199 | 0.683 | 0.455   |
| Lymphocytes          |                                | 0.055       | 0.040  | 0.167 | 0.354 | -0.123 | 0.067  | 0.068 | 0.209 | 0.022 |         |
| Neutrophils          |                                | 0.016       | 0.040  | 0.693 | 0.794 | 0.036  | 0.076  | 0.642 | 0.964 | 0.817 |         |
| Platelets            |                                | -0.053      | 0.035  | 0.136 | 0.655 | -0.080 | 0.062  | 0.202 | 0.729 | 0.708 |         |
| PLR                  |                                | -0.070      | 0.037  | 0.061 | 0.164 | 0.093  | 0.067  | 0.167 | 0.363 | 0.034 |         |
| IFN Cluster 21214954 | Basophils                      | -0.014      | 0.029  | 0.641 | 0.828 | -0.019 | 0.051  | 0.706 | 0.854 | 0.921 |         |
|                      | Eosinophils                    | -0.015      | 0.031  | 0.620 | 0.991 | -0.056 | 0.046  | 0.226 | 0.683 | 0.461 |         |
|                      | Lymphocytes                    | 0.048       | 0.031  | 0.114 | 0.354 | -0.094 | 0.048  | 0.053 | 0.209 | 0.013 |         |
|                      | Neutrophils                    | 0.024       | 0.030  | 0.425 | 0.626 | 0.021  | 0.055  | 0.705 | 0.964 | 0.957 |         |

|                        |                           |             |        |       |       |       |        |       |       |       |       |
|------------------------|---------------------------|-------------|--------|-------|-------|-------|--------|-------|-------|-------|-------|
|                        |                           | Platelets   | -0.037 | 0.027 | 0.170 | 0.655 | -0.044 | 0.045 | 0.331 | 0.729 | 0.903 |
|                        |                           | PLR         | -0.062 | 0.028 | 0.030 | 0.164 | 0.069  | 0.048 | 0.151 | 0.363 | 0.019 |
|                        | IFN signature<br>19272155 | Basophils   | -0.036 | 0.037 | 0.327 | 0.719 | -0.034 | 0.069 | 0.629 | 0.854 | 0.974 |
|                        |                           | Eosinophils | -0.030 | 0.039 | 0.447 | 0.991 | -0.081 | 0.062 | 0.195 | 0.683 | 0.483 |
|                        |                           | Lymphocytes | 0.052  | 0.039 | 0.179 | 0.354 | -0.121 | 0.065 | 0.065 | 0.209 | 0.022 |
|                        |                           | Neutrophils | 0.013  | 0.038 | 0.737 | 0.794 | 0.031  | 0.074 | 0.677 | 0.964 | 0.829 |
|                        |                           | Platelets   | -0.053 | 0.034 | 0.123 | 0.655 | -0.074 | 0.060 | 0.220 | 0.729 | 0.759 |
|                        |                           | PLR         | -0.070 | 0.036 | 0.055 | 0.164 | 0.093  | 0.065 | 0.153 | 0.363 | 0.028 |
|                        | Module3 IFN<br>score      | Basophils   | -0.021 | 0.035 | 0.540 | 0.796 | -0.034 | 0.063 | 0.597 | 0.854 | 0.864 |
|                        |                           | Eosinophils | -0.017 | 0.037 | 0.639 | 0.991 | -0.084 | 0.057 | 0.142 | 0.683 | 0.324 |
|                        |                           | Lymphocytes | 0.055  | 0.036 | 0.134 | 0.354 | -0.114 | 0.060 | 0.058 | 0.209 | 0.016 |
|                        |                           | Neutrophils | 0.030  | 0.036 | 0.408 | 0.626 | 0.020  | 0.068 | 0.764 | 0.964 | 0.902 |
|                        |                           | Platelets   | -0.046 | 0.032 | 0.155 | 0.655 | -0.053 | 0.055 | 0.338 | 0.729 | 0.910 |
|                        |                           | PLR         | -0.068 | 0.034 | 0.045 | 0.164 | 0.098  | 0.059 | 0.098 | 0.363 | 0.014 |
| Leukocyte<br>Subset ES | NK CD56dim<br>cells (ES)  | Basophils   | 0.005  | 0.014 | 0.715 | 0.828 | -0.003 | 0.032 | 0.923 | 0.943 | 0.813 |
|                        |                           | Eosinophils | 0.006  | 0.015 | 0.688 | 0.991 | -0.012 | 0.029 | 0.664 | 0.902 | 0.568 |
|                        |                           | Lymphocytes | 0.026  | 0.015 | 0.078 | 0.354 | -0.056 | 0.029 | 0.056 | 0.209 | 0.012 |
|                        |                           | Neutrophils | 0.036  | 0.015 | 0.015 | 0.090 | -0.034 | 0.033 | 0.312 | 0.964 | 0.056 |
|                        |                           | Platelets   | -0.017 | 0.013 | 0.194 | 0.655 | -0.023 | 0.027 | 0.403 | 0.753 | 0.852 |
|                        |                           | PLR         | -0.012 | 0.014 | 0.369 | 0.450 | 0.042  | 0.029 | 0.145 | 0.363 | 0.088 |
|                        | Th17 cells<br>(ES)        | Basophils   | 0.016  | 0.019 | 0.387 | 0.719 | -0.018 | 0.035 | 0.607 | 0.854 | 0.391 |
|                        |                           | Eosinophils | 0.005  | 0.020 | 0.784 | 0.991 | 0.004  | 0.032 | 0.901 | 0.939 | 0.970 |
|                        |                           | Lymphocytes | 0.017  | 0.020 | 0.398 | 0.530 | -0.006 | 0.034 | 0.870 | 0.900 | 0.570 |
|                        |                           | Neutrophils | 0.050  | 0.019 | 0.010 | 0.090 | -0.037 | 0.038 | 0.330 | 0.964 | 0.041 |
|                        |                           | Platelets   | -0.017 | 0.017 | 0.327 | 0.655 | -0.021 | 0.031 | 0.498 | 0.872 | 0.912 |
|                        |                           | PLR         | -0.036 | 0.018 | 0.047 | 0.164 | 0.011  | 0.033 | 0.749 | 0.843 | 0.215 |
|                        | Th2 cells (ES)            | Basophils   | -0.006 | 0.017 | 0.729 | 0.828 | -0.022 | 0.030 | 0.464 | 0.854 | 0.637 |
|                        |                           | Eosinophils | 0.011  | 0.017 | 0.536 | 0.991 | -0.008 | 0.027 | 0.774 | 0.939 | 0.563 |
|                        |                           | Lymphocytes | -0.008 | 0.018 | 0.663 | 0.714 | -0.004 | 0.028 | 0.900 | 0.900 | 0.901 |

|                         |                                      |             |         |       |       |       |        |       |       |       |         |
|-------------------------|--------------------------------------|-------------|---------|-------|-------|-------|--------|-------|-------|-------|---------|
|                         |                                      | Neutrophils | -0.004  | 0.017 | 0.807 | 0.837 | -0.060 | 0.031 | 0.056 | 0.964 | 0.117   |
|                         |                                      | Platelets   | 0.005   | 0.015 | 0.768 | 0.896 | -0.029 | 0.026 | 0.269 | 0.729 | 0.270   |
|                         |                                      | PLR         | 0.026   | 0.016 | 0.106 | 0.223 | 0.007  | 0.028 | 0.803 | 0.843 | 0.544   |
| Macrophage/<br>Monocyte | Attractor<br>Metagene - G<br>SIGLEC9 | Basophils   | 0.089   | 0.071 | 0.215 | 0.719 | 0.029  | 0.104 | 0.782 | 0.854 | 0.634   |
|                         |                                      | Eosinophils | -0.0004 | 0.075 | 0.995 | 0.995 | -0.015 | 0.093 | 0.876 | 0.939 | 0.906   |
|                         |                                      | Lymphocytes | 0.116   | 0.075 | 0.125 | 0.354 | -0.085 | 0.097 | 0.380 | 0.532 | 0.101   |
|                         |                                      | Neutrophils | 0.147   | 0.074 | 0.048 | 0.151 | -0.064 | 0.109 | 0.559 | 0.964 | 0.110   |
|                         |                                      | Platelets   | -0.043  | 0.067 | 0.516 | 0.732 | 0.043  | 0.089 | 0.633 | 0.886 | 0.440   |
|                         |                                      | PLR         | -0.160  | 0.070 | 0.023 | 0.164 | 0.140  | 0.095 | 0.143 | 0.363 | 0.011   |
|                         |                                      | Basophils   | 0.056   | 0.064 | 0.384 | 0.719 | -0.005 | 0.075 | 0.943 | 0.943 | 0.536   |
|                         | MHC2<br>signature<br>21978456        | Eosinophils | 0.078   | 0.067 | 0.243 | 0.991 | 0.055  | 0.068 | 0.413 | 0.723 | 0.809   |
|                         |                                      | Lymphocytes | 0.104   | 0.067 | 0.122 | 0.354 | -0.073 | 0.070 | 0.303 | 0.532 | 0.069   |
|                         |                                      | Neutrophils | 0.127   | 0.066 | 0.056 | 0.158 | -0.079 | 0.079 | 0.319 | 0.964 | 0.046   |
|                         |                                      | Platelets   | -0.002  | 0.060 | 0.967 | 0.967 | 0.012  | 0.065 | 0.850 | 0.988 | 0.867   |
|                         |                                      | PLR         | -0.066  | 0.063 | 0.293 | 0.391 | 0.153  | 0.069 | 0.028 | 0.299 | 0.019   |
|                         |                                      | Basophils   | 0.007   | 0.006 | 0.237 | 0.719 | -0.028 | 0.010 | 0.006 | 0.109 | 2.6E-03 |
|                         |                                      | Eosinophils | -0.004  | 0.006 | 0.535 | 0.991 | -0.010 | 0.009 | 0.266 | 0.683 | 0.561   |
| T-cell/<br>Cytotoxic    | CD8 T cells<br>(ES)                  | Lymphocytes | 0.007   | 0.006 | 0.267 | 0.440 | -0.031 | 0.009 | 0.001 | 0.037 | 8.3E-04 |
|                         |                                      | Neutrophils | 0.007   | 0.006 | 0.223 | 0.428 | -0.016 | 0.011 | 0.152 | 0.964 | 0.064   |
|                         |                                      | Platelets   | -0.005  | 0.005 | 0.374 | 0.655 | -0.002 | 0.009 | 0.837 | 0.988 | 0.776   |
|                         |                                      | PLR         | -0.010  | 0.006 | 0.070 | 0.164 | 0.013  | 0.010 | 0.160 | 0.363 | 0.032   |
|                         |                                      | Basophils   | 0.007   | 0.015 | 0.641 | 0.828 | -0.006 | 0.023 | 0.793 | 0.854 | 0.637   |
|                         |                                      | Eosinophils | 0.001   | 0.016 | 0.972 | 0.995 | -0.008 | 0.021 | 0.700 | 0.902 | 0.741   |
|                         | Cytotoxic<br>cells (ES)              | Lymphocytes | 0.022   | 0.016 | 0.156 | 0.354 | -0.053 | 0.021 | 0.014 | 0.169 | 4.4E-03 |
|                         |                                      | Neutrophils | 0.031   | 0.015 | 0.043 | 0.151 | 0.004  | 0.025 | 0.856 | 0.970 | 0.357   |
|                         |                                      | Platelets   | -0.013  | 0.014 | 0.357 | 0.655 | -0.006 | 0.020 | 0.760 | 0.967 | 0.787   |
|                         |                                      | PLR         | -0.019  | 0.015 | 0.186 | 0.307 | 0.030  | 0.021 | 0.168 | 0.363 | 0.059   |
|                         | Eosinophils<br>(ES)                  | Basophils   | 0.002   | 0.007 | 0.722 | 0.828 | 0.008  | 0.014 | 0.580 | 0.854 | 0.727   |
|                         |                                      | Eosinophils | -0.004  | 0.007 | 0.528 | 0.991 | -0.009 | 0.013 | 0.489 | 0.769 | 0.762   |

|                      |                        |                     |             |        |       |       |        |        |       |       |         |       |
|----------------------|------------------------|---------------------|-------------|--------|-------|-------|--------|--------|-------|-------|---------|-------|
| T-cell/<br>Cytotoxic |                        | Lymphocytes         | 0.002       | 0.007  | 0.802 | 0.832 | 0.012  | 0.013  | 0.371 | 0.532 | 0.497   |       |
|                      |                        | Neutrophils         | 0.003       | 0.007  | 0.676 | 0.794 | 0.010  | 0.015  | 0.512 | 0.964 | 0.673   |       |
|                      |                        | Platelets           | -0.007      | 0.006  | 0.229 | 0.655 | 0.000  | 0.012  | 0.973 | 0.988 | 0.569   |       |
|                      |                        | PLR                 | -0.003      | 0.007  | 0.670 | 0.734 | 0.004  | 0.013  | 0.749 | 0.843 | 0.634   |       |
|                      |                        | Macrophages<br>(ES) | Basophils   | 0.019  | 0.021 | 0.379 | 0.719  | 0.013  | 0.040 | 0.739 | 0.854   | 0.908 |
|                      |                        |                     | Eosinophils | -0.005 | 0.022 | 0.807 | 0.991  | -0.013 | 0.036 | 0.709 | 0.902   | 0.850 |
|                      |                        |                     | Lymphocytes | 0.039  | 0.022 | 0.080 | 0.354  | -0.030 | 0.037 | 0.419 | 0.533   | 0.111 |
|                      |                        |                     | Neutrophils | 0.051  | 0.022 | 0.019 | 0.090  | -0.023 | 0.042 | 0.590 | 0.964   | 0.118 |
|                      |                        |                     | Platelets   | -0.004 | 0.020 | 0.846 | 0.911  | -0.018 | 0.034 | 0.591 | 0.883   | 0.712 |
|                      |                        |                     | PLR         | -0.038 | 0.021 | 0.067 | 0.164  | 0.043  | 0.037 | 0.239 | 0.459   | 0.053 |
|                      |                        | Neutrophils<br>(ES) | Basophils   | 0.021  | 0.016 | 0.192 | 0.719  | 0.021  | 0.032 | 0.501 | 0.854   | 0.981 |
|                      |                        |                     | Eosinophils | 0.020  | 0.017 | 0.233 | 0.991  | -0.002 | 0.029 | 0.939 | 0.939   | 0.505 |
|                      |                        |                     | Lymphocytes | 0.038  | 0.016 | 0.023 | 0.328  | -0.023 | 0.030 | 0.446 | 0.543   | 0.076 |
|                      |                        |                     | Neutrophils | 0.047  | 0.016 | 0.004 | 0.090  | -0.005 | 0.033 | 0.875 | 0.970   | 0.156 |
|                      |                        |                     | Platelets   | -0.002 | 0.015 | 0.905 | 0.938  | 0.014  | 0.027 | 0.598 | 0.883   | 0.602 |
|                      |                        |                     | PLR         | -0.035 | 0.015 | 0.024 | 0.164  | 0.019  | 0.029 | 0.521 | 0.729   | 0.104 |
|                      |                        | NK cells (ES)       | Basophils   | 0.004  | 0.006 | 0.462 | 0.719  | -0.008 | 0.012 | 0.484 | 0.854   | 0.339 |
|                      |                        |                     | Eosinophils | -0.001 | 0.006 | 0.840 | 0.991  | -0.011 | 0.010 | 0.312 | 0.683   | 0.440 |
|                      |                        |                     | Lymphocytes | 0.0005 | 0.006 | 0.937 | 0.937  | -0.017 | 0.011 | 0.109 | 0.235   | 0.149 |
|                      |                        |                     | Neutrophils | 0.002  | 0.006 | 0.713 | 0.794  | -0.003 | 0.012 | 0.792 | 0.964   | 0.690 |
|                      |                        |                     | Platelets   | -0.006 | 0.005 | 0.282 | 0.655  | -0.009 | 0.010 | 0.394 | 0.753   | 0.808 |
|                      | PLR                    |                     | -0.003      | 0.006  | 0.566 | 0.660 | 0.009  | 0.011  | 0.415 | 0.646 | 0.322   |       |
|                      | T helper cells<br>(ES) | Basophils           | 0.008       | 0.008  | 0.347 | 0.719 | -0.040 | 0.015  | 0.008 | 0.109 | 5.0E-03 |       |
|                      |                        | Eosinophils         | -0.004      | 0.009  | 0.630 | 0.991 | -0.025 | 0.013  | 0.060 | 0.683 | 0.183   |       |
|                      |                        | Lymphocytes         | 0.007       | 0.009  | 0.428 | 0.545 | -0.012 | 0.014  | 0.413 | 0.533 | 0.266   |       |
|                      |                        | Neutrophils         | 0.010       | 0.008  | 0.253 | 0.442 | -0.024 | 0.016  | 0.136 | 0.964 | 0.063   |       |
|                      |                        | Platelets           | -0.002      | 0.008  | 0.761 | 0.896 | -0.013 | 0.013  | 0.306 | 0.729 | 0.463   |       |
|                      |                        | PLR                 | -0.003      | 0.008  | 0.682 | 0.734 | 0.014  | 0.014  | 0.309 | 0.541 | 0.276   |       |
|                      |                        | Basophils           | 0.011       | 0.011  | 0.318 | 0.719 | -0.045 | 0.023  | 0.056 | 0.519 | 0.030   |       |

|                      |                      |             |        |       |        |        |        |       |       |       |       |
|----------------------|----------------------|-------------|--------|-------|--------|--------|--------|-------|-------|-------|-------|
| T-cell/<br>Cytotoxic | T-CM cells<br>(ES)   | Eosinophils | 0.014  | 0.011 | 0.218  | 0.991  | -0.031 | 0.021 | 0.141 | 0.683 | 0.059 |
|                      |                      | Lymphocytes | 0.014  | 0.011 | 0.218  | 0.381  | -0.027 | 0.022 | 0.236 | 0.471 | 0.106 |
|                      |                      | Neutrophils | 0.015  | 0.011 | 0.191  | 0.428  | 0.002  | 0.025 | 0.948 | 0.983 | 0.640 |
|                      |                      | Platelets   | 0.007  | 0.010 | 0.462  | 0.722  | -0.026 | 0.021 | 0.218 | 0.729 | 0.152 |
|                      |                      | PLR         | -0.002 | 0.011 | 0.869  | 0.869  | 0.012  | 0.022 | 0.588 | 0.748 | 0.575 |
|                      | T-EM cells<br>(ES)   | Basophils   | 0.008  | 0.007 | 0.250  | 0.719  | -0.008 | 0.019 | 0.657 | 0.854 | 0.418 |
|                      |                      | Eosinophils | 0.001  | 0.007 | 0.927  | 0.995  | -0.028 | 0.017 | 0.101 | 0.683 | 0.120 |
|                      |                      | Lymphocytes | 0.019  | 0.007 | 0.006  | 0.178  | -0.017 | 0.018 | 0.331 | 0.532 | 0.055 |
|                      |                      | Neutrophils | 0.018  | 0.007 | 0.009  | 0.090  | 0.011  | 0.020 | 0.584 | 0.964 | 0.735 |
|                      |                      | Platelets   | -0.005 | 0.006 | 0.464  | 0.722  | -0.026 | 0.016 | 0.110 | 0.729 | 0.217 |
|                      | Tfh cells (ES)       | PLR         | -0.008 | 0.007 | 0.241  | 0.353  | -0.003 | 0.017 | 0.843 | 0.843 | 0.819 |
|                      |                      | Basophils   | -0.007 | 0.008 | 0.402  | 0.719  | -0.020 | 0.019 | 0.314 | 0.854 | 0.547 |
|                      |                      | Eosinophils | -0.007 | 0.009 | 0.404  | 0.991  | 0.017  | 0.018 | 0.341 | 0.683 | 0.220 |
|                      |                      | Lymphocytes | -0.005 | 0.009 | 0.538  | 0.602  | -0.016 | 0.018 | 0.380 | 0.532 | 0.594 |
|                      |                      | Neutrophils | 0.003  | 0.009 | 0.693  | 0.794  | 0.007  | 0.021 | 0.723 | 0.964 | 0.859 |
|                      | Th1 cells (ES)       | Platelets   | 0.005  | 0.008 | 0.549  | 0.732  | -0.018 | 0.017 | 0.297 | 0.729 | 0.230 |
|                      |                      | PLR         | 0.002  | 0.008 | 0.790  | 0.819  | 0.004  | 0.018 | 0.813 | 0.843 | 0.914 |
|                      |                      | Basophils   | -0.003 | 0.010 | 0.769  | 0.828  | -0.008 | 0.017 | 0.645 | 0.854 | 0.797 |
| Eosinophils          |                      | -0.008      | 0.010  | 0.455 | 0.991  | -0.013 | 0.015  | 0.387 | 0.723 | 0.758 |       |
| Lymphocytes          |                      | 0.006       | 0.010  | 0.522 | 0.602  | -0.025 | 0.015  | 0.104 | 0.235 | 0.086 |       |
| TGF- $\beta$         | TGFB PCA<br>17349583 | Neutrophils | 0.004  | 0.010 | 0.723  | 0.794  | -0.014 | 0.017 | 0.412 | 0.964 | 0.373 |
|                      |                      | Platelets   | -0.008 | 0.009 | 0.353  | 0.655  | -0.001 | 0.014 | 0.970 | 0.988 | 0.646 |
|                      |                      | PLR         | -0.011 | 0.009 | 0.252  | 0.353  | 0.003  | 0.015 | 0.837 | 0.843 | 0.439 |
|                      |                      | Basophils   | 0.031  | 0.033 | 0.352  | 0.719  | 0.029  | 0.073 | 0.686 | 0.854 | 0.982 |
|                      |                      | Eosinophils | 0.007  | 0.035 | 0.833  | 0.991  | -0.035 | 0.066 | 0.596 | 0.879 | 0.571 |
|                      |                      | Lymphocytes | 0.051  | 0.035 | 0.151  | 0.354  | -0.021 | 0.068 | 0.755 | 0.846 | 0.348 |
|                      |                      | Neutrophils | 0.076  | 0.035 | 0.028  | 0.113  | -0.086 | 0.076 | 0.261 | 0.964 | 0.053 |
| Platelets            | -0.008               | 0.031       | 0.802  | 0.898 | -0.001 | 0.063  | 0.988  | 0.988 | 0.922 |       |       |
| PLR                  | -0.040               | 0.033       | 0.227  | 0.353 | 0.078  | 0.067  | 0.246  | 0.459 | 0.114 |       |       |



**Supplementary Figure S1: Overview of glioma study populations.** For each study analyses were restricted to participants of predominantly European ancestry. Genome-wide association analyses from each study were combined using fixed effects meta-analysis and the results summary statistics were used for all Mendelian randomization analyses. For each molecular subtype, the number of mortality events is reported in brackets. Chromosome 1p/19q co-deletion typically does not occur in IDH wildtype tumors, therefore information on this molecular marker is not always present or assessed for this subtype.

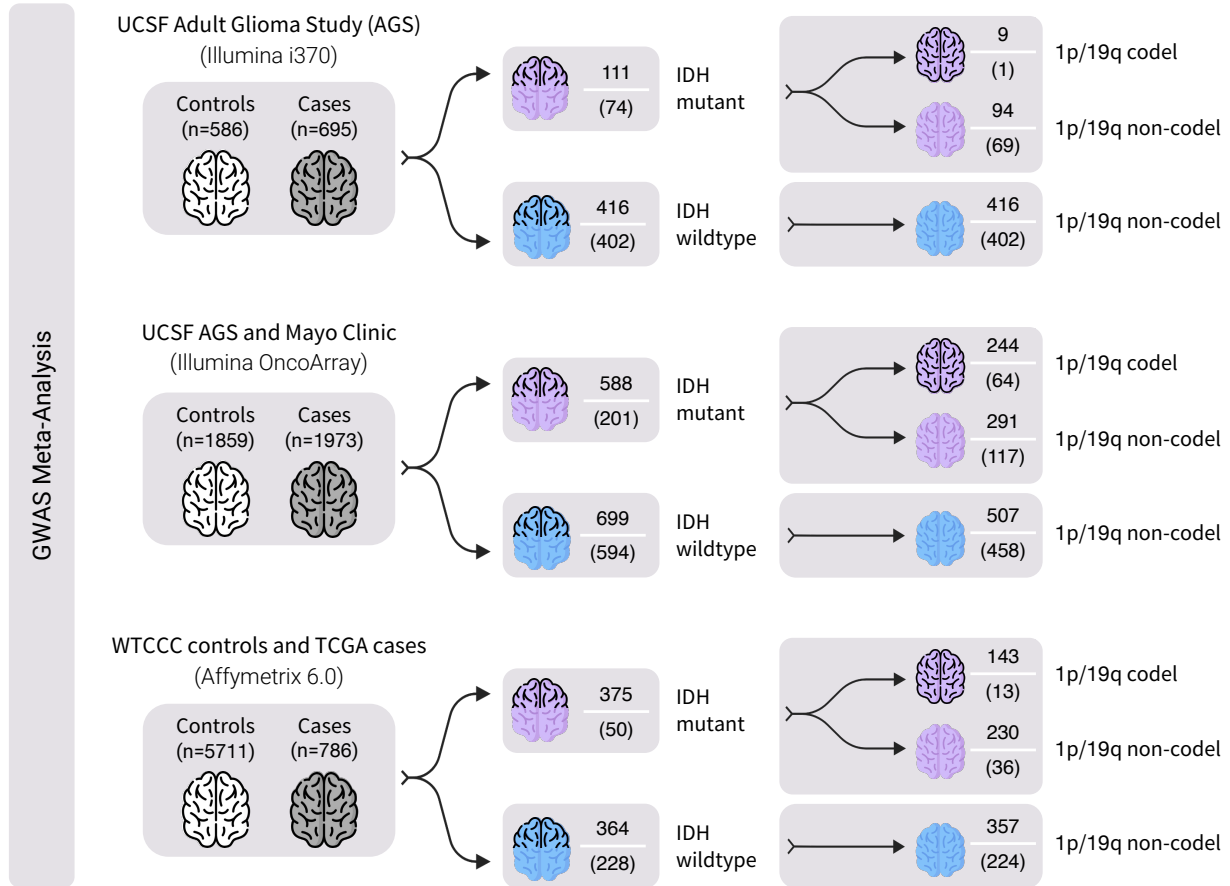

**Supplementary Figure S2: Effects on gene expression in brain tissues.** Prevalence of expression quantitative trait loci (eQTL) in GTEx v8 brain tissues among genetic instruments for blood cell traits and eGenes in regions linked to glioma susceptibility.

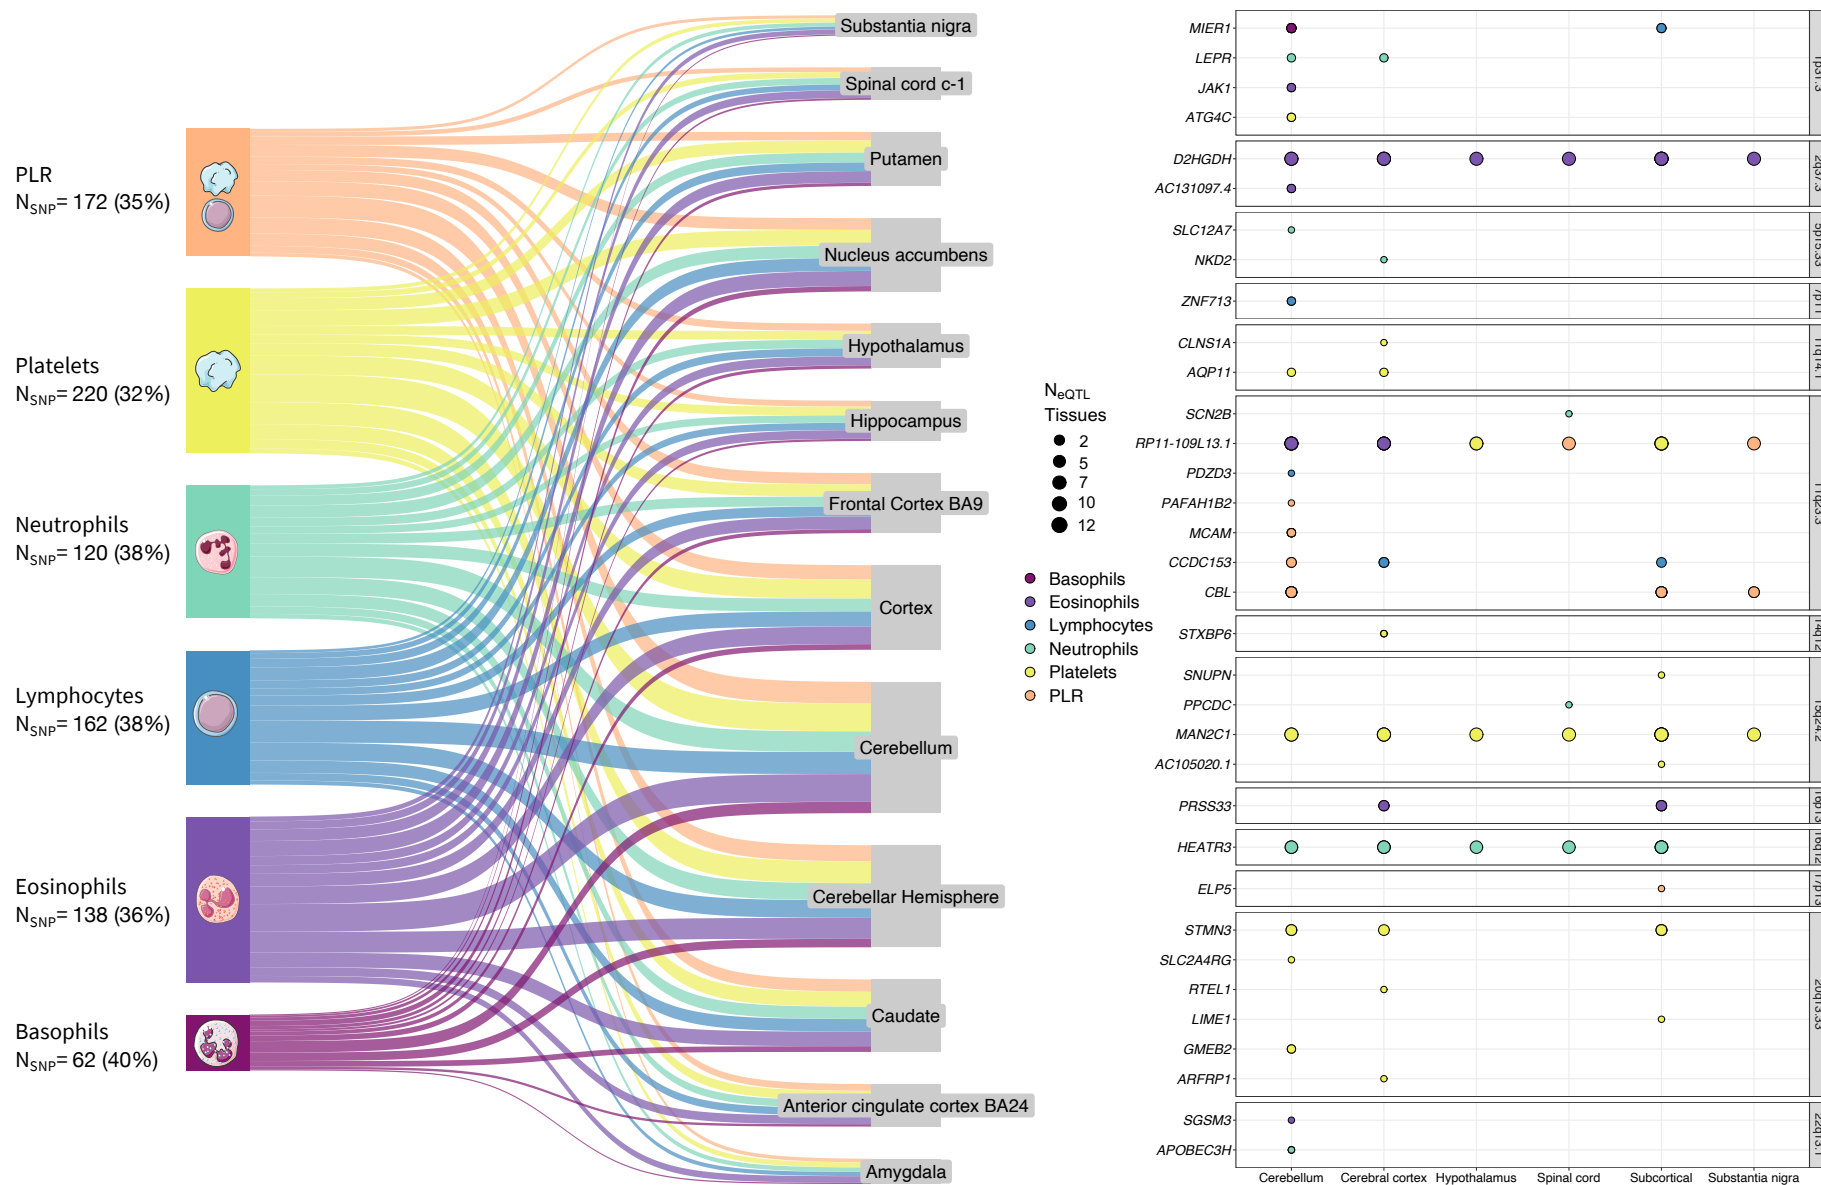

**Supplementary Figure S3: Regional association and z-score plots for colocated signals.** In each plot the LD is calculated with respect to the shared fine-mapped variant, indicated by the black diamond. For chromosome 20q13.33, the lead telomere length variant (rs13038527) is also shown, although the signal for telomere length did not colocalize.

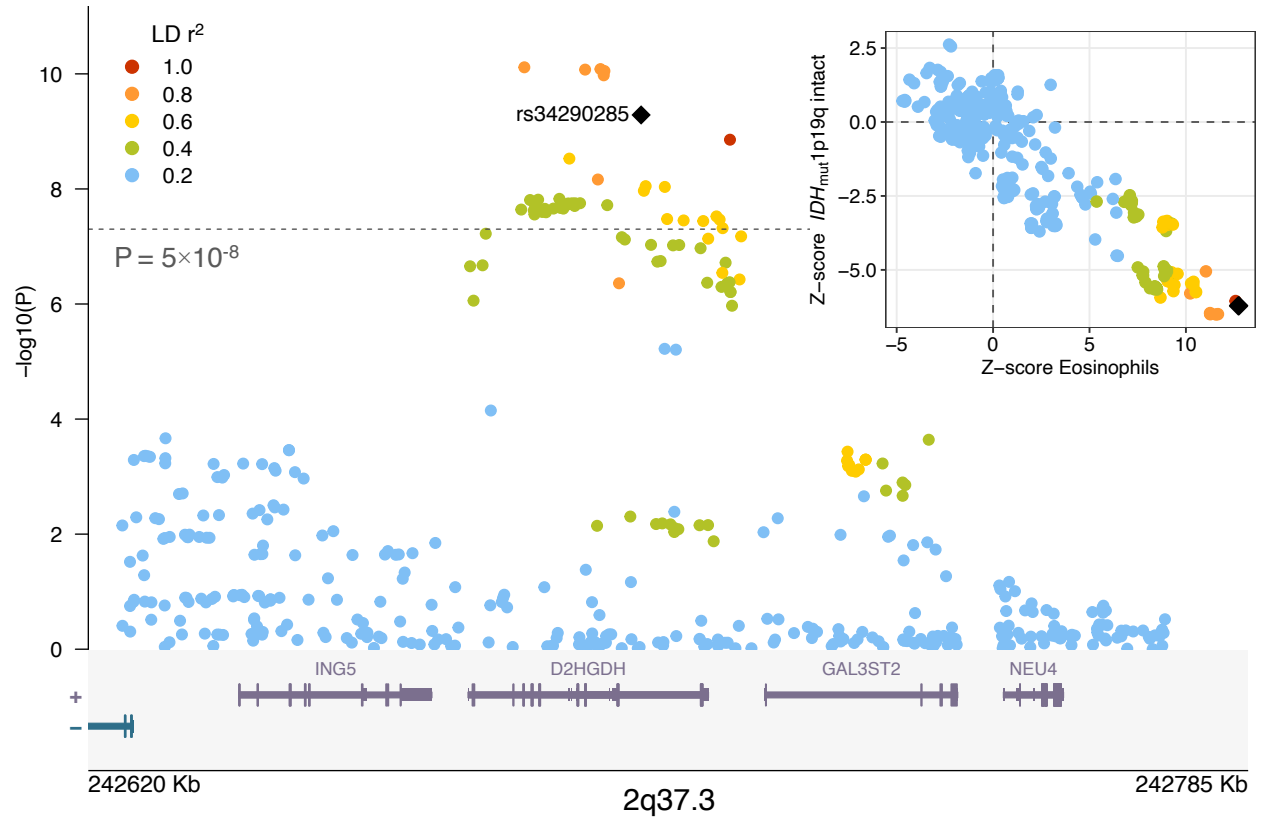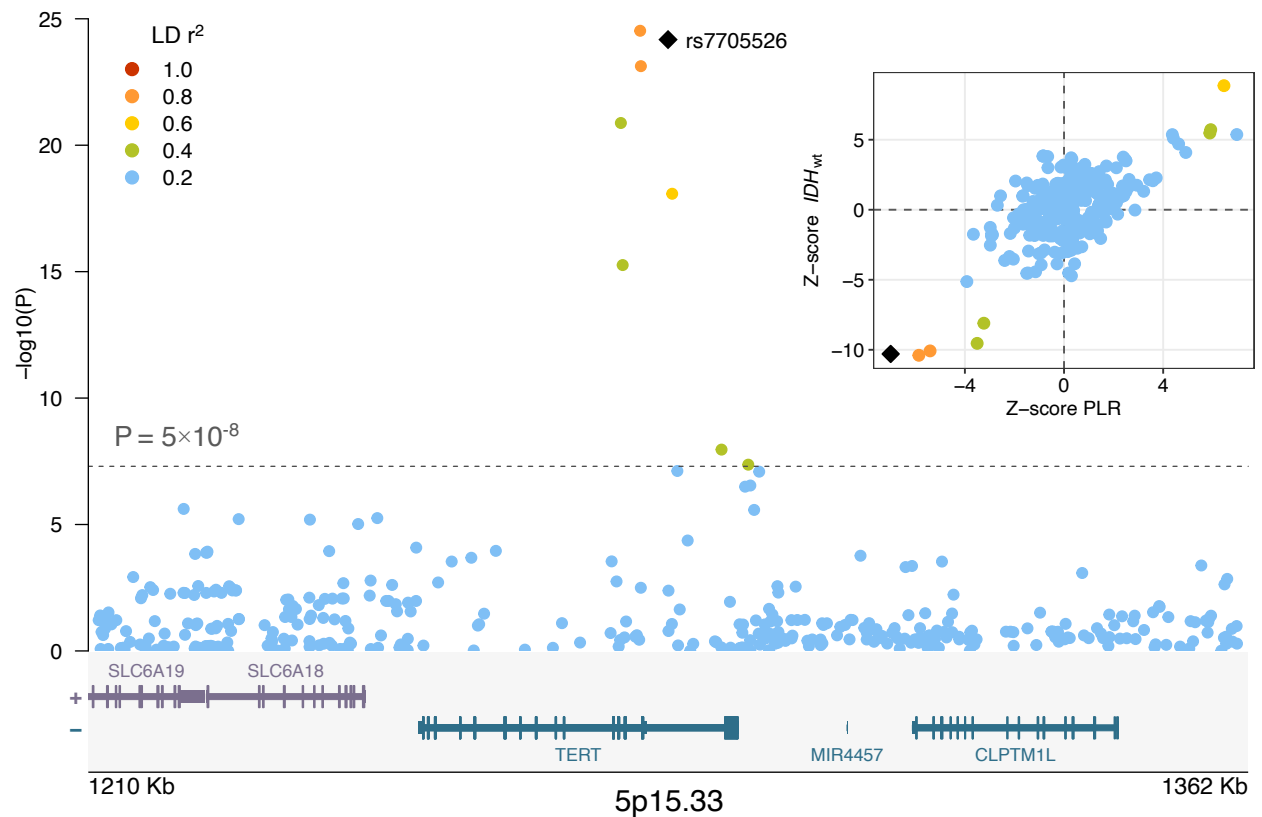

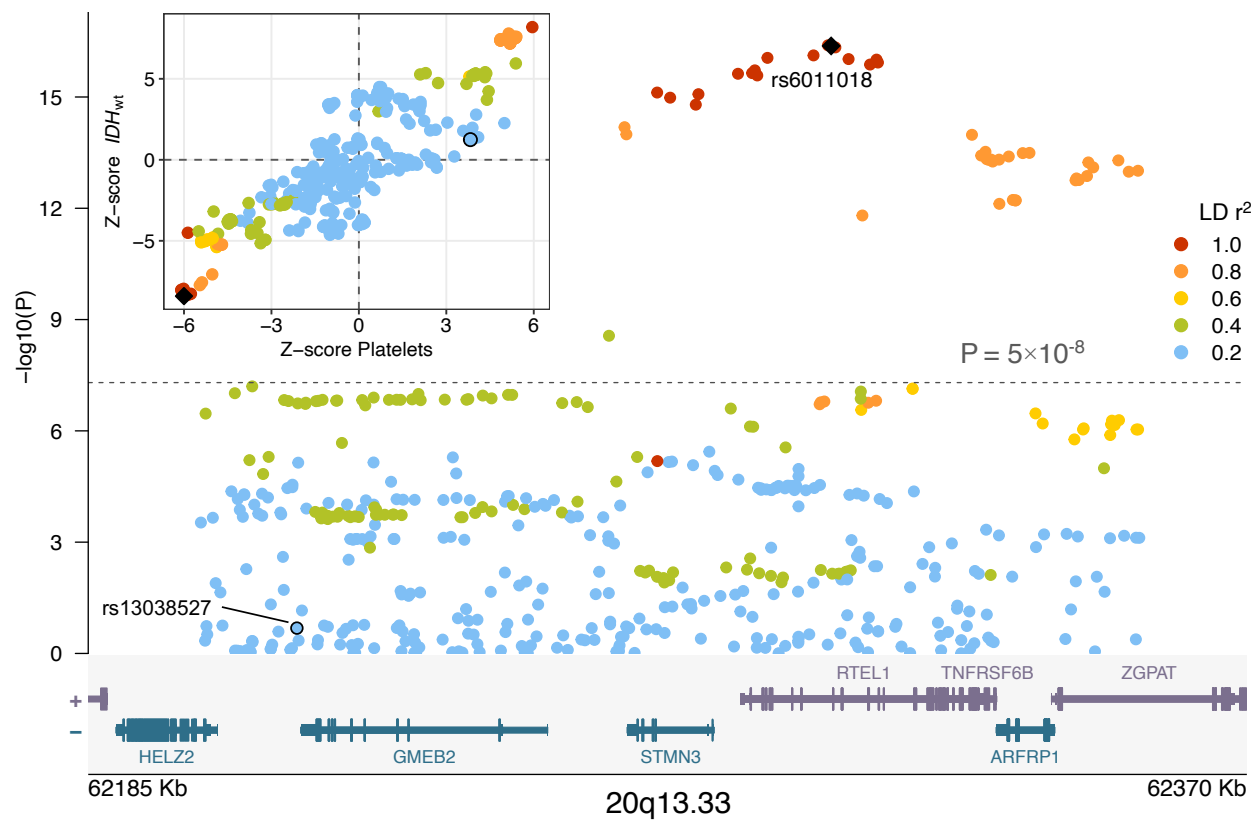

Supplement: media-1.pdf [file media-1.pdf]
